# Supplementary material for: Microneedle manipulation of the mammalian spindle reveals specialized, short-lived reinforcement near chromosomes
Source: eLife journal article supplement (doi:10.7554/elife.53807), 2020-03-19

**Figure 4- figure supplement 2:**  
**Immunofluorescence quantifications of inter-kinetochore distance**  
**and tubulin intensity between PRC1 RNAi and WT spindles**

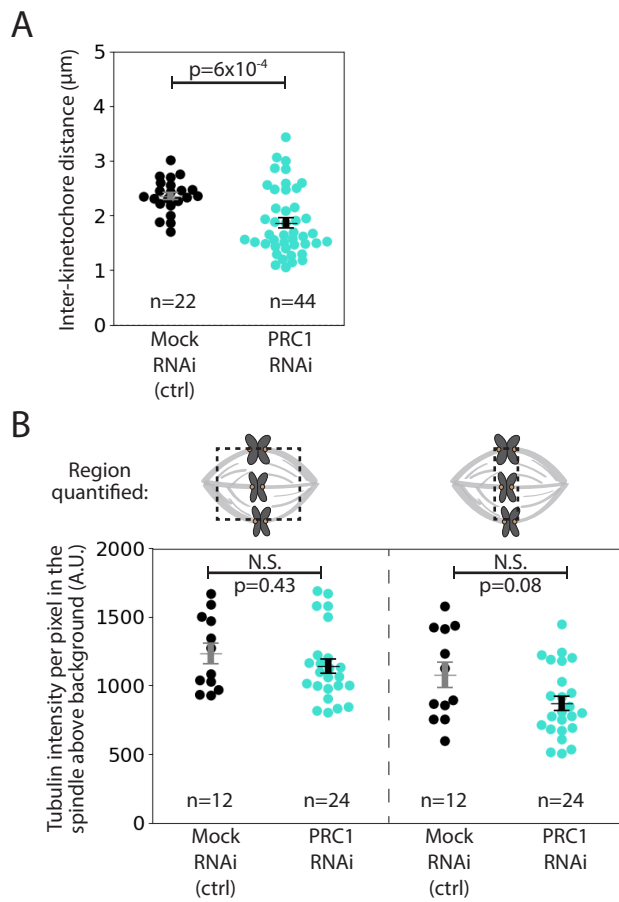

Supplement: supp [file elife-53807-supp-v1.zip]
