# Supplementary material for: Microneedle manipulation of the mammalian spindle reveals specialized, short-lived reinforcement near chromosomes
Source: eLife journal article supplement (doi:10.7554/elife.53807), 2020-03-19

**Figure 2- figure supplement 2:**  
**Additional example of a spindle manipulated for 12 s and its corresponding strain map**

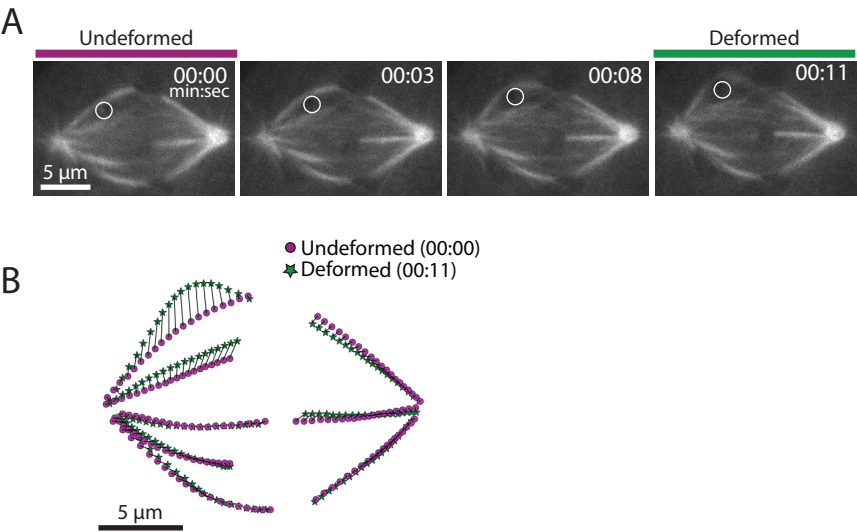

Supplement: supp [file elife-53807-supp-v1.zip]
