# Supplementary material for: Microneedle manipulation of the mammalian spindle reveals specialized, short-lived reinforcement near chromosomes
Source: eLife journal article supplement (doi:10.7554/elife.53807), 2020-03-19
Supplement: supp [file elife-53807-supp-v1.zip]

Archive with 31 entries (31 files):
- elife_poa_e53807_Figure_3_source_data_1.xlsx
- elife_poa_e53807_Source_code_3.py
- elife_poa_e53807_Figure_4_figure_supplement_1_source_data_1.xlsx
- elife_poa_e53807_Video_1.avi
- elife_poa_e53807_Video_5.avi
- elife_poa_e53807_Figure_3_figure_supplement_2_source_data_1.xlsx
- elife_poa_e53807_Figure_2_figure_supplement_3_source_data_1.xlsx
- elife_poa_e53807_Figure_2_figure_supplement_4.pdf
- elife_poa_e53807_Video_2.avi
- elife_poa_e53807_Figure_1_source_data_1.xlsx
- elife_poa_e53807_Figure_4_figure_supplement_2_source_data_1.xlsx
- elife_poa_e53807_Figure_2_figure_supplement_1.pdf
- elife_poa_e53807_Figure_3_figure_supplement_1_source_data_1.xlsx
- elife_poa_e53807_Video_3.avi
- elife_poa_e53807_Figure_2_figure_supplement_2.pdf
- elife_poa_e53807_Figure_3_figure_supplement_3_source_data_1.xlsx
- elife_poa_e53807_Video_4.avi
- elife_poa_e53807_Source_code_1.py
- elife_poa_e53807_Figure_3_figure_supplement_1.pdf
- elife_poa_e53807_Figure_2_figure_supplement_3.pdf
- elife_poa_e53807_Figure_2_figure_supplement_1_source_data_1.xlsx
- elife_poa_e53807_Figure_4_figure_supplement_2.pdf
- elife_poa_e53807_Figure_2_figure_supplement_4_source_data_1.xlsx
- elife_poa_e53807_Figure_3_figure_supplement_3.pdf
- elife_poa_e53807_Figure_4_figure_supplement_1.pdf
- elife_poa_e53807_Transparent_Reporting_File.docx
- elife_poa_e53807_Figure_4_source_data_1.xlsx
- elife_poa_e53807_Figure_1_figure_supplement_1.pdf
- elife_poa_e53807_Figure_2_source_data_1.xlsx
- elife_poa_e53807_Source_code_2.py
- elife_poa_e53807_Figure_3_figure_supplement_2.pdf
