# Supplementary material for: Microneedle manipulation of the mammalian spindle reveals specialized, short-lived reinforcement near chromosomes
Source: eLife journal article supplement (doi:10.7554/elife.53807), 2020-03-19
Supplement: supp [file elife-53807-supp-v1.zip › elife_poa_e53807_Figure_1_source_data_1.xlsx]

## Sheet: Fig 1C
Figure 1C
Cell height
Undeformed (μm)	Deformed (μm)
7.818	7.753
7.49	7.95
4.008	3.714
4.935	4.83
6.09	5.776
11.659	9.86
5.25	6.511

## Sheet: Fig 1F
Figure 1F
Microneedle displacement over time during manipulations
12 s manipulations				60 s manipulations
Experiment #	Microneedle displacement (μm)	Time (s)		Experiment #	Microneedle displacement (μm)	Time (s)
1	0	0		1	0	0
	0.402084	1			0.410673	4.056
	0.670868	2			0.389227	8.127
	0.793627	3			0.602847	12.152
	0.836675	4			0.808116	16.177
	1.03853	5			0.901644	20.217
	1.25954	6			1.01753	24.242
	1.56399	7			1.13473	28.282
	1.62451	8			1.41334	32.307
2	1.84194	9			1.44168	36.379
	0	0			1.68549	40.404
	0.362278	1			1.99431	44.444
	0.60127	2			2.05495	48.5
	1.19996	3			2.3151	52.541
	1.35301	4.5		2	0	0
	1.43824	6			0.556798	5.756
	1.50774	8			0.402693	9.75
	1.56955	9			0.577198	14.253
	1.67641	10			0.650178	18.293
	1.69632	12			0.875431	22.349
3	0	0			1.00872	26.358
	0.557544	1			1.39841	30.056
	0.980846	2			1.56299	34.08
	1.20165	3			1.79162	38.152
	1.3073	4			2.05851	42.27
	1.39965	5			2.17944	46.28
	1.41629	6			2.19777	50.32
	1.62152	7			2.25208	54.298
	1.69714	8			2.1883	58.354
	1.80468	9			2.25026	62.363
4	0	0			2.42651	66.856
	0.578515	2			2.54697	70.881
	0.846501	4		3	0	0
	0.927395	5.5			0.439765	7.093
	0.988841	7			0.469626	14.408
	1.10605	8.5			1.49829	21.148
	1.3718	10			1.80392	28.433
	1.51031	11.5			1.71533	35.439
	1.55647	13			1.82378	42.926
	2.04136	14.5			2.00443	49.517
5	0	0			1.75073	56.908
	0.124299	1			2.43578	63.517
	0.212459	2			2.61064	70.861
	0.400476	3		4	0	0
	0.651112	4.5			0.194329	7.063
	1.00357	6			0.473401	14.125
	1.04409	8			0.731184	21.079
	1.29442	9			0.719295	26.861
	1.43652	10			0.94882	31.063
	1.8988	12			0.948429	34.969
6	0	0			1.19286	39.063
	0.221113	1			1.40797	43.102
	0.280373	2			1.60693	47.59
	0.447198	3			1.77865	51.622
	1.23652	4.5			2.11024	55.624
	1.42472	6			2.09482	59.579
	1.57192	8			2.33303	63.22
	1.74458	9		5	0	0
	1.78821	10			0.151491	4
	1.97492	12			0.233871	8
7	0	0			0.458226	12
	0.325288	2			0.677714	16
	0.758421	4			0.748112	20
	0.665681	5.5			0.975905	24
	0.879451	7			1.29423	28
	1.02382	8.5			1.4838	32
	1.31358	10			1.66308	36
	1.36949	11.5			1.83613	40
	1.59453	13			1.89756	44
	1.59914	14.5			2.18729	48
					2.13154	52
					2.43251	56
				6	0	0
					0.456491	7.114
					1.09532	14.149
					1.1707	21.31
					1.26263	28.376
					1.34266	35.708
					1.56118	42.572
					1.7479	50.201
					1.97	56.706
					2.41877	63.711
					2.49677	67.72
				7	0	0
					0.491334	7.051
					0.511964	13.807
					0.986991	20.92
					1.75769	27.956
					2.12635	35.103
					2.00142	42.528
					2.64651	49.517
					2.92444	56.537
					2.91883	63.578
				8	0	0
					0.416671	6.615
					0.54659	13.619
					0.76951	20.623
					0.930042	27.706
					1.17098	35.007
					1.4372	41.855
					1.66725	48.969
					1.85814	56.552
					2.09222	63.119
					2.21572	70.514
				9	0	0
					0.19049	4.664
					0.500179	9.672
					0.600635	14.679
					0.777272	19.827
					0.756796	25.022
					0.976526	29.905
					1.12098	35.037
					1.3864	40.045
					1.51774	44.99
					1.4377	49.966
					1.58241	55.021
					1.72652	60.06
					1.73792	65.036
					2.09598	70.574
				10	0	0
					0.610265	5.008
					0.938189	10.468
					1.22922	15.507
					1.68514	20.499
					2.26906	25.21
					2.50481	30.28
					2.22792	35.459
					2.40075	43.498
					2.54887	49.474
				11	0	0
					0.166664	9.07
					0.322443	14.171
					0.581174	14.288
					0.941159	22.249
					1.36978	32.225
					1.5364	38.217
					1.71794	43.303
					2.68825	49.279
				12	0	0
					0.136566	2.961
					0.163126	7.015
					0.396366	11.007
					0.211971	15.077
					0.156297	19.553
					0.362583	23.248
					0.750774	27.256
					0.990712	31.264
					1.45515	35.287
					1.87658	39.326
					2.22833	43.552
					2.18903	47.575
					2.56992	50.614
				13	0	0
					0.146298	4.945
					0.453881	10.015
					0.935697	15.023
					1.04838	20.046
					1.25582	27.007
					1.18898	32.999
					1.2973	37.038
					1.58565	43.092
					2.24792	51.506
				14	0	0
					0.386439	4.033
					0.630637	8.376
					0.686536	12.172
					0.811606	16.11
					1.16275	20.172
					1.38482	24.298
					1.63113	28.282
					1.75675	32.329
					2.0946	36.376
					2.39447	40.406
					2.50623	44.438
					2.58717	48.501
					2.59524	52.923
					2.67886	56.923
					3.02141	60.671
					2.98498	64.686
					3.35992	68.719
				15	0	0
					0.401912	5.04
					0.598672	10.455
					1.11813	15.464
					1.32423	19.458
					1.52018	25.124
					1.69317	30.399
					1.63726	35.392
					2.29381	42.464
				16	0	0
					0.140616	4.041
					0.238734	8.066
					0.702066	12.106
					0.738135	16.162
					0.823128	20.187
					0.910736	24.212
					1.05098	28.252
					1.12754	32.308
					1.32574	36.348
					1.37528	40.389
					1.50315	44.429
					1.60505	48.454
					1.6923	52.494
					1.76103	56.551
					1.79442	60.607
					1.93253	64.678
					2.13262	68.672
					2.26785	72.712
				17	0	0
					0.119928	6.614
					0.534965	13.962
					0.954136	20.81
					1.1507	27.955
					1.53878	34.991
					1.82098	42.151
					2.21915	49.218
				18	0	0
					0.358502	4.025
					0.300559	7.987
					0.23646	12.043
					0.422277	16.068
					0.483604	20.077
					0.797882	24.133
					0.924743	28.174
					1.03306	32.261
					1.27186	36.239
					1.38083	40.232
					1.45916	44.288
					1.5618	48.329
					1.67204	52.369
				19	0	0
					0.375229	7.114
					0.350116	14.508
					0.539871	20.311
					0.852716	24.555
					1.35461	28.533
					1.48367	32.511
					1.61937	36.52
					2.0997	41.013
					2.16304	45.053
					2.52763	49.015
					2.7143	52.65
				20	0	0
					0.624602	7.348
					0.952563	14.462
					0.891385	21.419
					1.47841	28.424
					1.54798	35.397
					1.25317	42.12
					1.83794	49.234
					1.84916	56.307
					2.33491	63.405
				21	0	0
					0.7751	4.975
					1.17758	12.022
					1.30846	16.424
					1.62427	22.131
					1.67168	25.124
					1.8856	32.195
					2.1058	39.442
					2.3268	46.43
					2.53699	53.43
					2.49458	60.422
					2.91386	67.474
					2.8681	72.516
				22	0	0
					0.1	4.025
					0.23646	7.987
					0.300559	12.043
					0.422277	16.068
					0.483604	20.077
					0.797882	24.133
					0.924743	28.174
					1.33306	32.261
					1.2	36.239
					1.30846	40.232
					1.41945	44.288
					1.5618	48.329
					1.67204	52.369
				23	0	0
					0.119928	6.614
					0.522349	13.962
					0.824236	20.81
					1.1507	27.955
					1.53878	34.991
					1.82098	42.151
					2.21915	49.218
