# Supplementary material for: Microneedle manipulation of the mammalian spindle reveals specialized, short-lived reinforcement near chromosomes
Source: eLife journal article supplement (doi:10.7554/elife.53807), 2020-03-19
Supplement: supp [file elife-53807-supp-v1.zip › elife_poa_e53807_Figure_2_figure_supplement_1_source_data_1.xlsx]

## Sheet: Fig2-figsupp1
Figure 2-figure supplement 1
K fiber length (Deformed - undeformed) (μm)
Unmanipulated (Ctrl)	Manipulated
-0.0149337	0.0072927
-0.364569	0.382588
-0.0431553	0.000206719
-0.0929138	0.34492
0.105626	0.350873
0.2	0.305277
0.332306	0.126668
0.129138
