# Supplementary material for: Microneedle manipulation of the mammalian spindle reveals specialized, short-lived reinforcement near chromosomes
Source: eLife journal article supplement (doi:10.7554/elife.53807), 2020-03-19
Supplement: supp [file elife-53807-supp-v1.zip › elife_poa_e53807_Figure_2_figure_supplement_3_source_data_1.xlsx]

## Sheet: Fig2-figsupp3
Figure 2- figure supplement 3 A,B
WT, manipulated				FCPT, manipulated
Experiment #	Distance from microneedle (μm)	Magnitude of deformation (μm)		Experiment #	Distance from microneedle (μm)	Magnitude of deformation (μm)
1	0	1.326		1	0	1.70724
	1	0.852914			1	1.24698
	2	0.835596			2	0.89733
	3	0.576274			3	1.01083
	4	0.285634			4	0.682178
	5	0.149681		2	0	1.56039
	6	0.468923			1	1.29136
	7	0.48971			2	1.38189
	8	0.281213			3	0.769205
	9	0.114975			4	0.802519
2	0	1.57953			5	1.01375
	1	1.4483			6	1.1558
	2	0.637162		3	0	1.3
	3	0.699694			1	1
	4	0.449336			2	0.773629
	5	0.281001			3	1.23124
	6	0.178679			4	1.35578
	7	0.180116			5	0.583408
	8	0.172005		4	0	1.20076
3	0	1.5959			1	1.14567
	1	1.31223			2	0.704722
	2	0.908346			3	0.690342
	3	0.422427			4	0.564837
	4	0.252366			5	0.584999
	5	0.158352			6	0.58125
	6	0.419412			7	0.806229
	7	0.529467			8	0.662556
	8	0.492097
	9	0.627153
4	0	1.84939
	1	1.41091
	2	0.715001
	3	0.421747
	4	0.466099
	5	0.389195
	6	0.133517
	7	0.379887
	8	0.213831
5	0	1.25709
	1	0.868916
	2	0.567159
	3	0.549782
	4	0.607609
	5	0.431879
	6	0.505139
	7	0.444586
	8	0.383224
	9	0.276096
	10	0.198592
6	0	1.42565
	1	1.13225
	2	0.613501
	3	0.139099
	4	0.288635
	5	0.287352
	6	0.204895
	7	0.319333
	8	0.588051
7	0	1.57926
	1	1.63758
	2	1.59248
	3	1.2922
	4	1.04086
	5	0.823979
	6	0.644961
	7	0.309574
	8	0.285784
	9	0.649484
	10	0.517027
	11	0.194842
	12	0.364247
