# Supplementary material for: Microneedle manipulation of the mammalian spindle reveals specialized, short-lived reinforcement near chromosomes
Source: eLife journal article supplement (doi:10.7554/elife.53807), 2020-03-19

**Figure 2- figure supplement 4:**  
**The angle between sister kinetochore-fibers is preserved in 12 s manipulations**

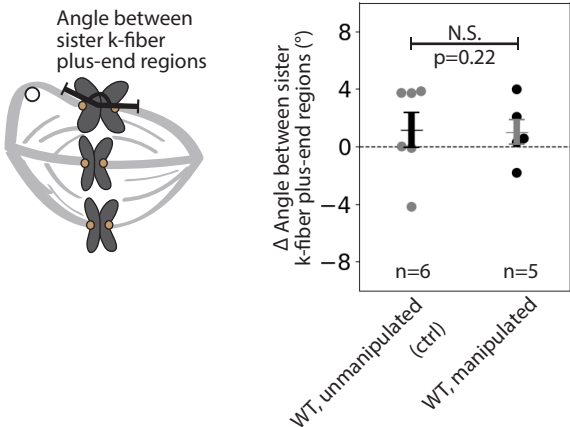

Supplement: supp [file elife-53807-supp-v1.zip › elife_poa_e53807_Figure_2_figure_supplement_4.pdf]
