# Supplementary material for: Microneedle manipulation of the mammalian spindle reveals specialized, short-lived reinforcement near chromosomes
Source: eLife journal article supplement (doi:10.7554/elife.53807), 2020-03-19
Supplement: supp [file elife-53807-supp-v1.zip › elife_poa_e53807_Figure_2_figure_supplement_4_source_data_1.xlsx]

## Sheet: Fig2-figsupp4
Figure 2-figure supplement 4
Angle between sister k-fiber plus-end regions (Deformed - undeformed) (°)
Unmanipulated (Ctrl)	Manipulated
0	0.291
3.841	-1.83
3.725	2.06
-4.192	0.558
-0.104	3.976
3.712
