# Supplementary material for: Microneedle manipulation of the mammalian spindle reveals specialized, short-lived reinforcement near chromosomes
Source: eLife journal article supplement (doi:10.7554/elife.53807), 2020-03-19
Supplement: supp [file elife-53807-supp-v1.zip › elife_poa_e53807_Figure_2_source_data_1.xlsx]

## Sheet: Fig2D
Figure 2D
WT, manipulated				FCPT, manipulated				WT, unmanipulated
Experiment #	Distance from microneedle (μm)	Magnitude of deformation (μm)		Experiment #	Distance from microneedle (μm)	Magnitude of deformation (μm)		Experiment #	Distance from microneedle (μm)	Magnitude of deformation (μm)
1	0	1.326		1	0	1.70724		1	0	0.234711
	1	0.852914			1	1.24698			1	0.353435
	2	0.835596			2	0.89733			2	0.378425
	3	0.576274			3	1.01083			3	0.312789
	4	0.285634			4	0.682178			4	0.289767
	5	0.149681		2	0	1.56039			5	0.412134
	6	0.468923			1	1.29136			6	0.527502
	7	0.48971			2	1.38189			7	0.184254
	8	0.281213			3	0.769205		2	0	0.240911
	9	0.114975			4	0.802519			1	0.169636
2	0	1.57953			5	1.01375			2	0.178006
	1	1.4483			6	1.1558			3	0.230207
	2	0.637162		3	0	1.3			4	0.276146
	3	0.699694			1	1			5	0.205709
	4	0.449336			2	0.773629			6	0.12194
	5	0.281001			3	1.23124			7	0.08611
	6	0.178679			4	1.35578		3	0	0.140911
	7	0.180116			5	0.583408			1	0.199636
	8	0.172005		4	0	1.20076			2	0.148356
3	0	1.5959			1	1.14567			3	0.21167
	1	1.31223			2	0.704722			4	0.276146
	2	0.908346			3	0.690342			5	0.205709
	3	0.422427			4	0.564837			6	0.12276
	4	0.252366			5	0.584999			7	0.18209
	5	0.158352			6	0.58125		4	0	0.214731
	6	0.419412			7	0.806229			1	0.343435
	7	0.529467			8	0.662556			2	0.328628
	8	0.492097							3	0.316721
	9	0.627153							4	0.279665
4	0	1.84939							5	0.311184
	1	1.41091							6	0.522935
	2	0.715001							7	0.189563
	3	0.421747
	4	0.466099
	5	0.389195
	6	0.133517
	7	0.379887
	8	0.213831
5	0	1.25709
	1	0.868916
	2	0.567159
	3	0.549782
	4	0.607609
	5	0.431879
	6	0.505139
	7	0.444586
	8	0.383224
	9	0.276096
	10	0.198592
6	0	1.42565
	1	1.13225
	2	0.613501
	3	0.139099
	4	0.288635
	5	0.287352
	6	0.204895
	7	0.319333
	8	0.588051
7	0	1.57926
	1	1.63758
	2	1.59248
	3	1.2922
	4	1.04086
	5	0.823979
	6	0.644961
	7	0.309574
	8	0.285784
	9	0.649484
	10	0.517027
	11	0.194842
	12	0.364247

## Sheet: Fig2F,G,H
Figure 2F			Figure 2G			Figure 2H
Inter-kinetochore distance (Deformed - undeformed) (μm)			Pole-pole distance (Deformed - undeformed) (μm)			Angle of sister k-fiber from pole-pole axis (Deformed - undeformed) (μm)
Unmanipulated (Ctrl)	Manipulated		Unmanipulated (Ctrl)	Manipulated		Unmanipulated (Ctrl)	Manipulated
-0.0430992	0.129363		0.0743067	-0.657591		0.544	-4.06943
0.415224	0		-0.0520344	-0.760937		2.399	-3.48484
-0.0061101	0.111493		-0.0645831	-0.640641		-0.332	-4.86122
-0.13659	0.0657		-0.154066	-0.229637		0.903	-3.39391
0.0852786	0.1971			-0.415027		-0.125	-8.93188
-0.319959	-0.0970389			-0.163133		0.182	-6.92112
0.0657	-0.114581			-0.628158		-0.749	-9.02924
0.106434				-0.515548
