# Supplementary material for: Microneedle manipulation of the mammalian spindle reveals specialized, short-lived reinforcement near chromosomes
Source: eLife journal article supplement (doi:10.7554/elife.53807), 2020-03-19

**Figure 3- figure supplement 1:**  
**Deformed kinetochore-fibers exhibit negative curvature in 12 s manipulations**

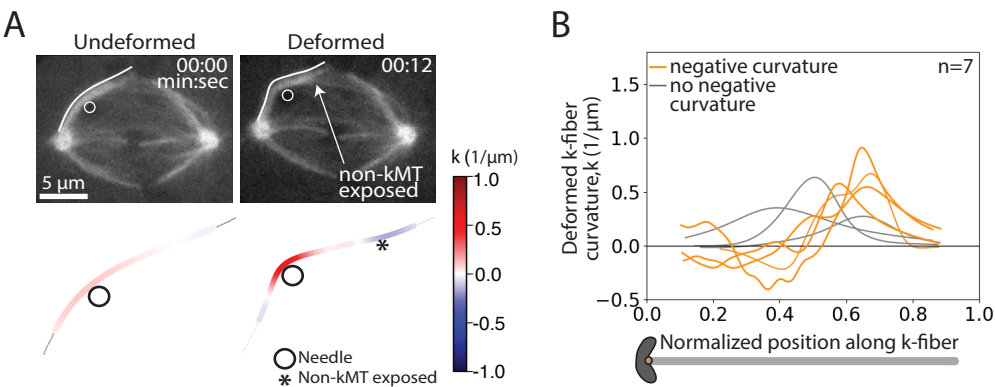

Supplement: supp [file elife-53807-supp-v1.zip › elife_poa_e53807_Figure_3_figure_supplement_1.pdf]
