# Supplementary material for: Microneedle manipulation of the mammalian spindle reveals specialized, short-lived reinforcement near chromosomes
Source: eLife journal article supplement (doi:10.7554/elife.53807), 2020-03-19
Supplement: supp [file elife-53807-supp-v1.zip › elife_poa_e53807_Figure_3_figure_supplement_1_source_data_1.xlsx]

## Sheet: Fig3-figsupp1
Figure 3- figure supplement 1
Curvature along k-fiber
Exp #	Normalized position along k-fiber	Curvature (1/μm)
1	0.103828	0.190112
	0.112638	0.178724
	0.121439	0.169928
	0.130181	0.16997
	0.138892	0.177046
	0.147641	0.186793
	0.156491	0.198387
	0.165453	0.211505
	0.17448	0.220875
	0.183532	0.219484
	0.19259	0.206081
	0.201654	0.18568
	0.21074	0.163369
	0.219869	0.139987
	0.229042	0.113263
	0.238234	0.0813375
	0.247428	0.0437096
	0.256683	-0.00154872
	0.266124	-0.0580362
	0.275802	-0.124267
	0.285555	-0.188713
	0.295132	-0.23706
	0.304422	-0.264127
	0.313469	-0.276287
	0.322373	-0.285454
	0.331223	-0.302784
	0.340074	-0.333107
	0.348913	-0.370376
	0.357678	-0.399768
	0.366349	-0.407432
	0.374967	-0.38973
	0.383577	-0.355916
	0.392211	-0.323753
	0.400921	-0.308779
	0.409714	-0.313725
	0.418492	-0.327944
	0.427152	-0.335944
	0.435745	-0.325554
	0.44442	-0.292394
	0.453213	-0.242666
	0.462005	-0.191299
	0.470701	-0.15244
	0.479323	-0.12998
	0.48792	-0.117364
	0.496512	-0.104667
	0.505105	-0.0852892
	0.513698	-0.0580299
	0.522295	-0.0241047
	0.530921	0.0173128
	0.539623	0.0685128
	0.548416	0.127419
	0.55722	0.185972
	0.56594	0.237628
	0.574577	0.284421
	0.583177	0.334644
	0.591771	0.396405
	0.600363	0.474892
	0.608955	0.571583
	0.617548	0.680811
	0.626143	0.786762
	0.634755	0.867966
	0.643434	0.908472
	0.652246	0.906685
	0.661197	0.873719
	0.670252	0.822167
	0.679441	0.758528
	0.688905	0.68759
	0.698909	0.617065
	0.709876	0.552847
	0.722416	0.494254
	0.737217	0.436477
	0.754859	0.375907
	0.775783	0.312933
	0.800278	0.251377
	0.828361	0.196163
	0.860022	0.150132
2	0.106942	-0.0660803
	0.115846	-0.0831299
	0.124728	-0.102119
	0.133563	-0.121214
	0.142324	-0.138664
	0.151002	-0.153583
	0.15961	-0.166192
	0.168174	-0.177345
	0.176712	-0.187671
	0.185218	-0.196843
	0.193658	-0.203321
	0.201988	-0.204831
	0.210181	-0.199619
	0.218251	-0.187686
	0.226237	-0.171022
	0.234178	-0.152672
	0.242103	-0.135419
	0.250023	-0.120826
	0.257942	-0.109011
	0.265862	-0.0991335
	0.273781	-0.0902486
	0.281701	-0.0819235
	0.28962	-0.0742954
	0.297539	-0.0676612
	0.305458	-0.0619951
	0.313375	-0.0567709
	0.321284	-0.0510888
	0.329172	-0.0438491
	0.337024	-0.0340352
	0.344832	-0.0213445
	0.352598	-0.00679117
	0.360334	0.0075515
	0.368056	0.0196769
	0.375776	0.0284846
	0.383513	0.0334417
	0.391288	0.0337171
	0.399128	0.0281976
	0.407049	0.0166189
	0.415041	0.000464782
	0.423079	-0.0174964
	0.431132	-0.0344937
	0.439171	-0.0484445
	0.447164	-0.0576241
	0.455077	-0.0602841
	0.462896	-0.0549952
	0.470633	-0.0410003
	0.478316	-0.0177016
	0.485973	0.0158524
	0.49362	0.0600212
	0.501272	0.112853
	0.508944	0.170036
	0.51666	0.227484
	0.524453	0.284398
	0.532341	0.343207
	0.540317	0.405149
	0.548352	0.465945
	0.556426	0.517527
	0.564557	0.55375
	0.572813	0.572998
	0.581302	0.576569
	0.590122	0.566139
	0.599296	0.542691
	0.608776	0.508437
	0.618577	0.468575
	0.628941	0.427944
	0.640392	0.387297
	0.653538	0.345074
	0.668669	0.301522
	0.68558	0.259399
	0.703889	0.221239
	0.723587	0.187273
	0.745516	0.155535
	0.771442	0.123271
	0.803096	0.0891685
	0.840245	0.0548508
	0.879796	0.0235839
3	0.1114	-0.137275
	0.120604	-0.129987
	0.129805	-0.117523
	0.139004	-0.104796
	0.148204	-0.0978658
	0.157404	-0.100279
	0.166603	-0.110075
	0.175803	-0.121373
	0.185003	-0.129478
	0.194203	-0.134223
	0.203402	-0.1387
	0.212602	-0.146031
	0.221802	-0.157577
	0.231002	-0.172628
	0.240202	-0.188475
	0.249406	-0.201149
	0.258631	-0.207133
	0.267914	-0.205343
	0.277273	-0.197902
	0.286681	-0.188205
	0.296106	-0.177755
	0.305543	-0.166126
	0.314986	-0.153899
	0.324415	-0.142847
	0.333828	-0.132813
	0.343238	-0.121543
	0.352652	-0.108382
	0.362067	-0.0951738
	0.371501	-0.0825078
	0.380999	-0.0673931
	0.390594	-0.0458688
	0.400265	-0.0169929
	0.409962	0.0164279
	0.419651	0.0509824
	0.429332	0.0858117
	0.439016	0.121643
	0.448684	0.157369
	0.458294	0.189852
	0.467829	0.217422
	0.477307	0.24099
	0.48674	0.260528
	0.496106	0.272981
	0.505388	0.275884
	0.514612	0.27159
	0.523815	0.265824
	0.533015	0.262709
	0.542215	0.262871
	0.551415	0.266061
	0.560615	0.273926
	0.569814	0.289457
	0.579014	0.313883
	0.588214	0.344886
	0.597413	0.378835
	0.606614	0.41389
	0.615823	0.449203
	0.625071	0.482221
	0.634423	0.509322
	0.643921	0.528621
	0.653557	0.540284
	0.663325	0.544517
	0.673286	0.540616
	0.68356	0.528011
	0.694255	0.507722
	0.705369	0.482575
	0.716801	0.455468
	0.728511	0.427381
	0.74063	0.39777
	0.753391	0.366546
	0.766962	0.334714
	0.781335	0.303522
	0.796372	0.273894
	0.811938	0.246498
	0.828042	0.221732
	0.844944	0.199405
	0.863188	0.17862
	0.883507	0.158238
4	0.878744	-0.0114843
	0.869274	-0.0133555
	0.859955	-0.015401
	0.850795	-0.0174966
	0.841797	-0.0194099
	0.832959	-0.0207711
	0.824274	-0.0210366
	0.815729	-0.0194408
	0.807309	-0.0149376
	0.799	-0.00615123
	0.790783	0.00861387
	0.782639	0.0312266
	0.77455	0.0633802
	0.766494	0.106069
	0.758448	0.159078
	0.750391	0.22075
	0.742304	0.288214
	0.734175	0.35795
	0.726	0.426416
	0.717788	0.490467
	0.709553	0.54749
	0.701317	0.595345
	0.693103	0.632264
	0.684937	0.656853
	0.676846	0.66827
	0.668856	0.666547
	0.660992	0.652926
	0.653278	0.62997
	0.64573	0.601251
	0.638356	0.570688
	0.631149	0.541789
	0.624087	0.51711
	0.617137	0.498035
	0.610259	0.484833
	0.603404	0.476852
	0.596526	0.472768
	0.589573	0.470865
	0.582496	0.469318
	0.575249	0.466441
	0.567796	0.460819
	0.560122	0.451346
	0.552234	0.437192
	0.544166	0.417774
	0.535973	0.392739
	0.527716	0.361978
	0.519466	0.325662
	0.511288	0.284304
	0.503251	0.238802
	0.495417	0.190404
	0.487846	0.140554
	0.480584	0.0906922
	0.473658	0.0420948
	0.467056	-0.00418899
	0.460723	-0.0473212
	0.454558	-0.0866276
	0.448438	-0.121549
	0.44223	-0.151601
	0.435809	-0.17636
	0.429062	-0.195489
	0.421891	-0.208797
	0.414205	-0.21631
	0.405925	-0.218299
	0.396987	-0.215237
	0.387345	-0.207732
	0.376981	-0.19647
	0.365896	-0.182176
	0.35411	-0.165612
	0.34165	-0.147572
	0.328547	-0.128861
	0.314833	-0.110275
	0.300539	-0.092541
	0.285697	-0.076257
	0.27034	-0.0618225
	0.254499	-0.0494154
	0.238208	-0.0390188
	0.221497	-0.0304867
5	0.882458	0.0296181
	0.874506	0.0328837
	0.866532	0.0364818
	0.858533	0.0404625
	0.850509	0.0448801
	0.842458	0.049793
	0.834379	0.0552636
	0.826269	0.0613568
	0.818129	0.0681385
	0.809957	0.0756714
	0.801754	0.0840113
	0.793519	0.0932021
	0.785254	0.10327
	0.776962	0.114217
	0.768645	0.126012
	0.760304	0.138584
	0.751942	0.151815
	0.743561	0.165542
	0.735164	0.179554
	0.726754	0.193596
	0.718332	0.207379
	0.7099	0.220589
	0.701462	0.232902
	0.69302	0.244
	0.684576	0.253586
	0.676132	0.261402
	0.667691	0.267239
	0.659254	0.270945
	0.650825	0.272434
	0.642405	0.271685
	0.633996	0.26875
	0.625601	0.263754
	0.617222	0.256886
	0.608861	0.248391
	0.60052	0.238551
	0.592204	0.22767
	0.583915	0.216058
	0.575658	0.204018
	0.567439	0.191826
	0.559264	0.179724
	0.551139	0.167909
	0.543069	0.156534
	0.535061	0.145705
	0.52712	0.135495
	0.519251	0.125943
	0.511461	0.117063
	0.503756	0.108844
	0.496139	0.101258
	0.488616	0.0942674
	0.481192	0.0878266
	0.473872	0.0818873
	0.46666	0.0763997
	0.45956	0.0713142
	0.452575	0.066584
	0.44571	0.0621665
	0.438967	0.0580241
	0.432347	0.0541233
	0.42585	0.0504335
	0.419473	0.0469264
	0.413206	0.0435768
	0.407039	0.0403624
	0.400953	0.0372645
	0.394932	0.0342661
	0.388955	0.0313511
	0.383002	0.0285046
	0.377052	0.025714
	0.371084	0.0229692
	0.365078	0.0202633
	0.359013	0.0175924
	0.352869	0.0149555
	0.346626	0.0123546
	0.340264	0.00979519
	0.333766	0.00728589
	0.327112	0.0048377
	0.320285	0.00246237
	0.313268	0.000171708
	0.306048	-0.00202189
	0.298614	-0.00410445
	0.290959	-0.00606004
	0.283083	-0.00787111
	0.274988	-0.00951992
	0.266679	-0.0109902
	0.258163	-0.0122688
	0.249445	-0.0133462
	0.240533	-0.0142174
	0.231434	-0.0148817
	0.222156	-0.0153426
	0.212707	-0.0156082
	0.203093	-0.01569
	0.193324	-0.0156011
	0.183407	-0.0153546
	0.173349	-0.0149633
	0.163158	-0.0144408
6	0.874531	-0.0106403
	0.864268	-0.0115996
	0.854052	-0.0125767
	0.843885	-0.0135715
	0.833772	-0.0145862
	0.823716	-0.0156273
	0.813721	-0.0167086
	0.803789	-0.0178544
	0.793926	-0.0191003
	0.784133	-0.0204916
	0.774415	-0.0220816
	0.764775	-0.0239314
	0.755218	-0.0261104
	0.745748	-0.0286953
	0.736369	-0.0317708
	0.72709	-0.0354309
	0.717919	-0.0397813
	0.708863	-0.0449367
	0.699933	-0.0510162
	0.691136	-0.0581376
	0.682482	-0.0664162
	0.673976	-0.0759686
	0.665623	-0.0869204
	0.657427	-0.099414
	0.649388	-0.113616
	0.641503	-0.129725
	0.633768	-0.147969
	0.626172	-0.168598
	0.618703	-0.191873
	0.611341	-0.218033
	0.604063	-0.247254
	0.596838	-0.279585
	0.589632	-0.314883
	0.582405	-0.352765
	0.575113	-0.392576
	0.567717	-0.433381
	0.560181	-0.47398
	0.552475	-0.512969
	0.544578	-0.548824
	0.536472	-0.580016
	0.528146	-0.605117
	0.519594	-0.622907
	0.510812	-0.632465
	0.501799	-0.633243
	0.49256	-0.625091
	0.483098	-0.608249
	0.47342	-0.583323
	0.463535	-0.551259
	0.453453	-0.513308
	0.443184	-0.470962
	0.432741	-0.425856
	0.422137	-0.379645
	0.411386	-0.33387
	0.400501	-0.289834
	0.389499	-0.248512
	0.378393	-0.210519
	0.367198	-0.176157
	0.355927	-0.145502
	0.344591	-0.118498
	0.333198	-0.0950178
	0.321753	-0.0748899
	0.310259	-0.0579072
	0.298717	-0.0438226
	0.28713	-0.0323512
	0.2755	-0.0231812
	0.263827	-0.0159931
	0.252114	-0.0104816
	0.240363	-0.00636901
	0.228574	-0.00340895
	0.21675	-0.00138124
	0.204893	-8.52027e-05
	0.193004	0.000663938
	0.181086	0.00103221
	0.169139	0.00115931
	0.157167	0.00115167
	0.14517	0.00108068
7	0.85797	-0.0497832
	0.846377	-0.0540721
	0.834841	-0.0583975
	0.823366	-0.062757
	0.811954	-0.0671416
	0.800609	-0.0715481
	0.789335	-0.0759852
	0.778136	-0.0804645
	0.767013	-0.0849926
	0.755971	-0.0895747
	0.745011	-0.0942237
	0.734135	-0.0989619
	0.723345	-0.103815
	0.712643	-0.10881
	0.702029	-0.113972
	0.691506	-0.119334
	0.681075	-0.124934
	0.670735	-0.130805
	0.660486	-0.136972
	0.650327	-0.143451
	0.640255	-0.15026
	0.63027	-0.157411
	0.620368	-0.16491
	0.610548	-0.172754
	0.600805	-0.180924
	0.591134	-0.189393
	0.581529	-0.19813
	0.571983	-0.207104
	0.562489	-0.216278
	0.55304	-0.22561
	0.54363	-0.23506
	0.534253	-0.244586
	0.524904	-0.254148
	0.515576	-0.263697
	0.506266	-0.273179
	0.496968	-0.282539
	0.487677	-0.29172
	0.478391	-0.300661
	0.469105	-0.309285
	0.459816	-0.317492
	0.450523	-0.325156
	0.441222	-0.332132
	0.431911	-0.338259
	0.422588	-0.343371
	0.413252	-0.347302
	0.403902	-0.349905
	0.394537	-0.351053
	0.385156	-0.350642
	0.375759	-0.348598
	0.366347	-0.344875
	0.356919	-0.339475
	0.347475	-0.332455
	0.338017	-0.32393
	0.328544	-0.31406
	0.319059	-0.303043
	0.309562	-0.291099
	0.300054	-0.278458
	0.290533	-0.26534
	0.281002	-0.251958
	0.271458	-0.238504
	0.261903	-0.225149
	0.252336	-0.212036
	0.242757	-0.199276
	0.233166	-0.186946
	0.223562	-0.175095
	0.213946	-0.163746
	0.204317	-0.152904
	0.194677	-0.142562
	0.185025	-0.132697
	0.175361	-0.12328
	0.165686	-0.114277
	0.156	-0.105652
	0.146304	-0.0973758
	0.136597	-0.0894252
	0.126881	-0.0817827
	0.117157	-0.0744308
