# Supplementary material for: Microneedle manipulation of the mammalian spindle reveals specialized, short-lived reinforcement near chromosomes
Source: eLife journal article supplement (doi:10.7554/elife.53807), 2020-03-19
Supplement: supp [file elife-53807-supp-v1.zip › elife_poa_e53807_Figure_3_figure_supplement_2_source_data_1.xlsx]

## Sheet: Fig3-figsupp2
Figure 3- figure supplement 2B			Figure 3- figure supplement 2C
Interkinetochore distance (Deformed - undeformed) (μm)			Angle of sister k-fiber from pole-pole axis (Deformed - undeformed) (°)
Unmanipulated, Ctrl	Manipulated		Unmanipulated (Ctrl)	Manipulated
-0.538545	0.576395		1.282	-9.366
-0.082215	0.253967		-2.023	-8.248
0.200025	-0.173855		1.576	-14.611
-0.02499	0.00513559		2.297	-15.673
0.073815	0.021762		1.937	-11.946
0.284025	0.366523		-1.284	-16.649
-0.12537	0.181734		2.105	-5.901
-0.488775	-0.0354149		2.163	-14.101
-0.40383			-0.453	-7.171
-0.177			-3.277	-5.489
-0.772			4.824	-7.499
0.089			2.792
-0.022
