# Supplementary material for: Microneedle manipulation of the mammalian spindle reveals specialized, short-lived reinforcement near chromosomes
Source: eLife journal article supplement (doi:10.7554/elife.53807), 2020-03-19
Supplement: supp [file elife-53807-supp-v1.zip › elife_poa_e53807_Figure_3_figure_supplement_3_source_data_1.xlsx]

## Sheet: Fig3-figsupp3
Figure 3- figure supplement 3
MT contact position from plus-end (μm)	Curvature minima position from plus-end (1/μm)	Distance b/w MT contact and negative curvature (μm)
3.31582	1.72536	1.59046
0	0	0
1.46458	0.66124	0.803341
2.18724	1.82548	0.361763
0.856389	0.382591	0.473798
0.927283	0.927283	0
2.25365	0.372637	1.88102
3.11708	0.372637	2.74444
1.00313	1.00313	0
0	0.332874	0.332874
0.645435	1.13759	0.492153
2.62862	0.777423	1.8512
2.29113	0.777423	1.5137
2.43399	0	2.43399
