# Supplementary material for: Microneedle manipulation of the mammalian spindle reveals specialized, short-lived reinforcement near chromosomes
Source: eLife journal article supplement (doi:10.7554/elife.53807), 2020-03-19
Supplement: supp [file elife-53807-supp-v1.zip › elife_poa_e53807_Figure_3_source_data_1.xlsx]

## Sheet: Fig3C
Figure 3C
Curvature along k-fiber
Exp #	Normalized position along k-fiber	Curvature (1/μm)
1	0.109544	-0.0512657
	0.118828	-0.0413373
	0.128506	-0.0292093
	0.138849	-0.01573
	0.149777	-0.00392137
	0.160927	0.00338139
	0.171855	0.0029397
	0.182198	-0.0103294
	0.191887	-0.0382602
	0.201233	-0.0732395
	0.210676	-0.103861
	0.220385	-0.124522
	0.230142	-0.136474
	0.239657	-0.143694
	0.248965	-0.149238
	0.258417	-0.153981
	0.268323	-0.157624
	0.278805	-0.159597
	0.290325	-0.157939
	0.304289	-0.14835
	0.322599	-0.127145
	0.346214	-0.0954298
	0.374288	-0.0578248
	0.404612	-0.0180028
	0.434832	0.022851
	0.463595	0.065606
	0.490621	0.112951
	0.515627	0.168091
	0.53761	0.231395
	0.555508	0.297735
	0.569268	0.359945
	0.579931	0.416366
	0.588765	0.472008
	0.596564	0.533718
	0.6037	0.607856
	0.610452	0.701351
	0.617051	0.820698
	0.62352	0.966383
	0.629669	1.1278
	0.635352	1.28354
	0.640661	1.40595
	0.645806	1.47726
	0.650909	1.50337
	0.656008	1.49872
	0.661106	1.47127
	0.666208	1.42634
	0.67134	1.3674
	0.676642	1.29097
	0.68242	1.1883
	0.68893	1.05676
	0.696065	0.90984
	0.703484	0.769864
	0.711045	0.646935
	0.718997	0.532619
	0.72765	0.415783
	0.736893	0.298254
	0.746209	0.191908
	0.755196	0.10571
	0.763895	0.0406016
	0.772631	-0.00677315
	0.781624	-0.0399003
	0.790708	-0.0612559
	0.799456	-0.0731385
	0.807596	-0.0782555
	0.815207	-0.0786135
	0.822535	-0.074151
	0.829767	-0.0638201
	0.836981	-0.0480124
	0.844212	-0.0286908
	0.85154	-0.00779944
	0.859152	0.0115319
	0.86729	0.0217202
	0.876023	0.0167764
	0.885027	0.0088763
	0.89376	0.00545836
	0.901898	0.00390347
2	0.119267	-0.262453
	0.131912	-0.237063
	0.144969	-0.201839
	0.158319	-0.156851
	0.171816	-0.106057
	0.185299	-0.0539442
	0.198758	-0.00168615
	0.212359	0.0528316
	0.226176	0.11127
	0.240009	0.17242
	0.253579	0.234363
	0.266772	0.297313
	0.279587	0.362387
	0.291944	0.428243
	0.303674	0.490504
	0.314659	0.544415
	0.324931	0.5871
	0.33464	0.617695
	0.343999	0.636515
	0.353202	0.644257
	0.362361	0.641591
	0.371516	0.628984
	0.380695	0.606008
	0.389965	0.570685
	0.399439	0.520927
	0.409196	0.457692
	0.419224	0.386408
	0.429439	0.314894
	0.439735	0.250099
	0.450034	0.196125
	0.460305	0.153483
	0.470551	0.119463
	0.480788	0.0900952
	0.491022	0.0628632
	0.501256	0.0379353
	0.51149	0.0169235
	0.521724	0.000838187
	0.531958	-0.0106373
	0.542191	-0.0186351
	0.55243	-0.0246643
	0.562688	-0.0303658
	0.572996	-0.036701
	0.583367	-0.0430686
	0.593758	-0.0478227
	0.60407	-0.0500206
	0.614234	-0.050289
	0.624259	-0.0498069
	0.634197	-0.0487705
	0.64408	-0.0459715
	0.653925	-0.0398678
	0.663749	-0.0302703
	0.673563	-0.0189401
	0.683372	-0.00848206
	0.693218	-0.00127092
	0.703188	0.000837958
	0.713331	-0.00216102
	0.723538	-0.00674855
	0.733619	-0.00788963
	0.743504	-0.00402379
	0.75327	0.00129433
	0.763045	0.00274312
	0.772955	-0.00298528
	0.78306	-0.0154326
	0.793266	-0.0304384
	0.803373	-0.0424605
	0.813283	-0.047876
	0.823048	-0.0462153
	0.832778	-0.0395005
	0.842575	-0.031827
	0.8525	-0.0278502
	0.862505	-0.0288732
	0.872438	-0.0307402
	0.882196	-0.0268059
	0.891824	-0.0126773
	0.901416	0.0112245
	0.911027	0.0397216
3	0.104358	-0.104995
	0.112406	-0.118639
	0.120485	-0.134866
	0.128927	-0.150073
	0.137862	-0.163127
	0.147261	-0.174212
	0.157283	-0.181513
	0.168313	-0.181761
	0.18052	-0.173872
	0.19348	-0.161058
	0.206434	-0.148365
	0.21903	-0.137784
	0.231834	-0.126777
	0.246012	-0.1119
	0.262466	-0.0924235
	0.281312	-0.070165
	0.302019	-0.0474735
	0.32357	-0.0263428
	0.344538	-0.00840546
	0.3637	0.00562618
	0.380997	0.0169788
	0.397744	0.0292077
	0.415591	0.0469269
	0.434997	0.0729071
	0.454575	0.105666
	0.472247	0.140287
	0.487247	0.173281
	0.500639	0.207715
	0.513894	0.252078
	0.527452	0.313666
	0.540648	0.392635
	0.55262	0.481192
	0.562995	0.569399
	0.571839	0.65196
	0.579387	0.729517
	0.58597	0.80577
	0.592005	0.885115
	0.597837	0.972723
	0.603607	1.07154
	0.609251	1.17604
	0.614676	1.27459
	0.619932	1.35457
	0.625124	1.4032
	0.630305	1.41271
	0.635486	1.38661
	0.640666	1.33845
	0.645849	1.28324
	0.651056	1.22762
	0.656381	1.16677
	0.662038	1.09135
	0.668253	0.997864
	0.675105	0.892137
	0.682617	0.782551
	0.690921	0.671475
	0.70017	0.557609
	0.710241	0.445233
	0.72061	0.344759
	0.730695	0.263195
	0.740359	0.198346
	0.749984	0.142988
	0.760023	0.0922302
	0.770524	0.0462923
	0.781099	0.0080029
	0.791287	-0.0205681
	0.80096	-0.0399132
	0.810431	-0.0534676
	0.820217	-0.0662645
	0.8306	-0.0821863
	0.841354	-0.101644
	0.851895	-0.121208
	0.861727	-0.135668
	0.870738	-0.141423
	0.879151	-0.138401
	0.887266	-0.129296
	0.895283	-0.117752
	0.90328	-0.10686
4	0.114759	-0.0579971
	0.124811	-0.0615447
	0.134959	-0.0654906
	0.145131	-0.0705275
	0.155306	-0.0754607
	0.165481	-0.0792072
	0.175656	-0.0820868
	0.185832	-0.0853693
	0.196007	-0.0904397
	0.206182	-0.0980705
	0.216358	-0.107883
	0.226548	-0.118861
	0.23681	-0.130068
	0.247294	-0.140219
	0.258232	-0.147321
	0.269763	-0.150177
	0.28171	-0.150212
	0.293638	-0.150327
	0.305298	-0.151331
	0.317004	-0.150221
	0.329451	-0.142699
	0.343058	-0.127402
	0.357487	-0.107218
	0.372063	-0.0860275
	0.386575	-0.064966
	0.401381	-0.0424845
	0.416857	-0.016809
	0.433049	0.0131028
	0.449769	0.0483828
	0.466728	0.0899972
	0.483432	0.136637
	0.499244	0.184253
	0.513773	0.229661
	0.527098	0.273861
	0.539505	0.320312
	0.551201	0.370939
	0.562302	0.424849
	0.572873	0.479642
	0.582905	0.532465
	0.592368	0.580442
	0.601294	0.621122
	0.609794	0.652793
	0.618004	0.674901
	0.626022	0.688158
	0.633843	0.692757
	0.641415	0.686962
	0.648763	0.670509
	0.655995	0.649151
	0.663194	0.632508
	0.67039	0.62694
	0.677585	0.632311
	0.684779	0.644665
	0.691974	0.659541
	0.699169	0.672955
	0.706364	0.681885
	0.713559	0.686195
	0.720755	0.68963
	0.727956	0.695751
	0.735204	0.701317
	0.742662	0.695972
	0.75064	0.669426
	0.759388	0.617809
	0.768856	0.545034
	0.778762	0.460871
	0.788803	0.376951
	0.798731	0.302494
	0.808383	0.241791
	0.817772	0.193113
	0.827155	0.149788
	0.836893	0.105412
	0.847168	0.0601955
	0.857739	0.0221244
	0.868062	0.00186291
	0.877725	0.0056159
	0.886777	0.0300517
	0.895622	0.0631612
5	0.112323	0.00533167
	0.121596	-0.0655557
	0.130869	-0.120589
	0.140142	-0.155397
	0.149422	-0.1736
	0.158729	-0.18202
	0.168101	-0.184061
	0.177579	-0.176883
	0.187173	-0.156376
	0.196827	-0.126858
	0.206413	-0.103658
	0.215846	-0.10206
	0.225165	-0.124782
	0.234446	-0.162985
	0.24372	-0.205651
	0.252999	-0.243847
	0.262314	-0.270214
	0.271767	-0.281053
	0.28146	-0.280405
	0.291315	-0.279591
	0.301123	-0.288486
	0.31082	-0.304203
	0.320527	-0.310578
	0.330398	-0.292531
	0.340489	-0.249942
	0.350726	-0.195296
	0.361011	-0.140479
	0.371271	-0.0897782
	0.381472	-0.0424
	0.391667	0.00497869
	0.401986	0.057499
	0.41249	0.119141
	0.423074	0.188533
	0.433535	0.25736
	0.443708	0.313681
	0.453572	0.350237
	0.463267	0.371701
	0.472979	0.391363
	0.482811	0.417664
	0.492659	0.445399
	0.50231	0.461598
	0.511727	0.456938
	0.521029	0.430618
	0.530305	0.388306
	0.539578	0.338056
	0.548851	0.287338
	0.558124	0.241911
	0.567397	0.204536
	0.57667	0.173048
	0.585943	0.142514
	0.595216	0.1128
	0.604489	0.0926248
	0.613762	0.0924952
	0.623035	0.114166
	0.632308	0.150493
	0.641581	0.194524
	0.650854	0.24427
	0.660127	0.299497
	0.6694	0.359243
	0.678673	0.423201
	0.687946	0.491565
	0.697222	0.561897
	0.70652	0.627157
	0.715927	0.678084
	0.725575	0.709467
	0.735488	0.724141
	0.745545	0.728511
	0.755688	0.724578
	0.766002	0.70916
	0.776592	0.679191
	0.787511	0.634459
	0.798863	0.578275
	0.810886	0.517951
	0.823914	0.461158
	0.838298	0.411016
	0.854282	0.36597
6	0.124935	-0.10426
	0.135171	-0.11238
	0.145419	-0.117067
	0.156103	-0.117279
	0.167758	-0.113481
	0.180668	-0.107184
	0.194701	-0.0993604
	0.209539	-0.0895981
	0.225058	-0.0768876
	0.241405	-0.0609624
	0.258673	-0.0427576
	0.276558	-0.0238482
	0.294442	-0.00571199
	0.3117	0.0105699
	0.327892	0.0243348
	0.342927	0.0356024
	0.357158	0.0453249
	0.371101	0.0548414
	0.385027	0.0650184
	0.398956	0.0763513
	0.412901	0.0897597
	0.426846	0.106696
	0.440627	0.128688
	0.454072	0.157302
	0.46714	0.194058
	0.479797	0.239305
	0.491861	0.290656
	0.503108	0.343012
	0.513484	0.391552
	0.523163	0.435796
	0.532392	0.480328
	0.541294	0.530129
	0.549787	0.583935
	0.557664	0.63272
	0.564846	0.66562
	0.571517	0.676311
	0.577964	0.664117
	0.584357	0.63244
	0.590744	0.588974
	0.597144	0.546283
	0.603586	0.516539
	0.610062	0.501182
	0.616497	0.487708
	0.622879	0.460947
	0.629306	0.419014
	0.635785	0.378213
	0.642234	0.361157
	0.648636	0.379712
	0.655022	0.428365
	0.661405	0.489327
	0.667794	0.542646
	0.674221	0.575034
	0.680768	0.583237
	0.687526	0.572779
	0.694528	0.554076
	0.701729	0.536398
	0.709058	0.522742
	0.716482	0.50921
	0.724118	0.488518
	0.73227	0.454869
	0.741282	0.407555
	0.751205	0.352018
	0.761685	0.297591
	0.772305	0.252028
	0.782974	0.217009
	0.793898	0.189094
	0.80525	0.164246
	0.81701	0.140484
	0.829103	0.117412
	0.841512	0.0953758
	0.854189	0.0751422
	0.866972	0.0568818
	0.879687	0.0388825
	0.892328	0.017331
	0.905138	-0.0129268
	0.918534	-0.0567467
7	0.110036	-0.142563
	0.119335	-0.167104
	0.128799	-0.182365
	0.138363	-0.188262
	0.147915	-0.19003
	0.157444	-0.192109
	0.167064	-0.195268
	0.17692	-0.198114
	0.187076	-0.199217
	0.197434	-0.197614
	0.207841	-0.192472
	0.218276	-0.183229
	0.228895	-0.170083
	0.239892	-0.153947
	0.251291	-0.135742
	0.262899	-0.116109
	0.274463	-0.0957926
	0.285894	-0.0750911
	0.297376	-0.0519942
	0.309278	-0.022036
	0.3218	0.0180421
	0.334625	0.0661677
	0.347138	0.1159
	0.359063	0.162382
	0.370625	0.205874
	0.382131	0.248882
	0.39362	0.292317
	0.404911	0.336096
	0.415857	0.38146
	0.426385	0.429242
	0.43641	0.47571
	0.445894	0.513631
	0.45498	0.538723
	0.463895	0.553324
	0.472769	0.56346
	0.481639	0.572622
	0.490508	0.579272
	0.499377	0.58013
	0.508247	0.573231
	0.517134	0.557587
	0.526123	0.532154
	0.535415	0.497089
	0.545177	0.456288
	0.555354	0.416233
	0.565821	0.380192
	0.576649	0.345364
	0.588027	0.307018
	0.599998	0.263512
	0.61239	0.216399
	0.625007	0.167925
	0.637658	0.120706
	0.650109	0.0781202
	0.66229	0.0420241
	0.674489	0.0106198
	0.687112	-0.0196984
	0.700236	-0.0506766
	0.713524	-0.0812063
	0.726602	-0.109328
	0.739309	-0.133685
	0.751583	-0.152937
	0.763344	-0.165271
	0.774572	-0.169434
	0.785347	-0.165771
	0.795759	-0.155804
	0.805883	-0.141411
	0.815852	-0.124769
	0.825847	-0.108152
	0.835969	-0.0927372
	0.846132	-0.0776923
	0.856183	-0.0611545
	0.866084	-0.042698
	0.875936	-0.0248147
	0.885879	-0.0116
	0.89601	-0.00599355
	0.906367	-0.00860538
	0.916919	-0.0183612
8	0.110349	-0.0733251
	0.119062	-0.0885602
	0.128297	-0.101176
	0.138677	-0.107616
	0.150309	-0.107469
	0.162666	-0.10376
	0.175046	-0.0999824
	0.187118	-0.0972229
	0.199115	-0.0944405
	0.21151	-0.0905958
	0.224471	-0.0855404
	0.237713	-0.0796465
	0.251105	-0.0731001
	0.265345	-0.0654348
	0.281671	-0.0559376
	0.300804	-0.044322
	0.322646	-0.030323
	0.347308	-0.0124891
	0.375613	0.0120923
	0.407456	0.0464254
	0.439923	0.0919195
	0.468388	0.146427
	0.489995	0.203139
	0.505448	0.256139
	0.517296	0.306061
	0.527371	0.355868
	0.536185	0.406235
	0.543788	0.457145
	0.550382	0.510358
	0.55628	0.570504
	0.561761	0.645757
	0.567027	0.743779
	0.572165	0.858487
	0.577152	0.959281
	0.581956	1.01368
	0.586637	1.02162
	0.591273	1.00074
	0.595902	0.964336
	0.60053	0.926079
	0.605158	0.901208
	0.609787	0.895195
	0.614423	0.89806
	0.619101	0.8917
	0.623897	0.863413
	0.628846	0.815269
	0.633868	0.762841
	0.638867	0.72264
	0.643847	0.698533
	0.6489	0.681308
	0.654156	0.658842
	0.659776	0.623831
	0.665949	0.574549
	0.672836	0.514
	0.680396	0.450316
	0.688272	0.394173
	0.69598	0.352237
	0.703263	0.323431
	0.710255	0.301317
	0.717371	0.278975
	0.725137	0.252553
	0.733977	0.22213
	0.744022	0.190224
	0.755193	0.159276
	0.767482	0.130076
	0.780962	0.102189
	0.795464	0.0754569
	0.810358	0.0510433
	0.82481	0.0309086
	0.838315	0.0158265
	0.850991	0.00432563
	0.863343	-0.00575894
	0.875754	-0.0151247
	0.888225	-0.0223214
	0.900528	-0.0246495
	0.912468	-0.0204559
	0.923981	-0.0112064
9	0.127234	-0.0807688
	0.138712	-0.0788907
	0.15028	-0.0831789
	0.161936	-0.0905104
	0.173786	-0.0972458
	0.185909	-0.102484
	0.198286	-0.106827
	0.210831	-0.110065
	0.223335	-0.111756
	0.235445	-0.112878
	0.246891	-0.115288
	0.257886	-0.118753
	0.2693	-0.118508
	0.282382	-0.107
	0.297909	-0.0798006
	0.315423	-0.0398509
	0.333736	0.00602787
	0.352049	0.0541385
	0.370077	0.10498
	0.387296	0.158091
	0.402891	0.20883
	0.416639	0.251917
	0.429164	0.287209
	0.441106	0.319101
	0.452529	0.350166
	0.463253	0.378309
	0.47334	0.400319
	0.483066	0.416456
	0.492638	0.429662
	0.50206	0.439346
	0.511147	0.438937
	0.519717	0.424295
	0.527865	0.4045
	0.535945	0.398463
	0.544244	0.416669
	0.552653	0.45043
	0.560821	0.483449
	0.568666	0.510444
	0.576371	0.537454
	0.584035	0.566651
	0.591623	0.593407
	0.599158	0.619239
	0.606723	0.654791
	0.614256	0.704834
	0.621537	0.758508
	0.628506	0.798754
	0.635314	0.816406
	0.642087	0.816222
	0.648855	0.812874
	0.655624	0.817169
	0.662393	0.826555
	0.669162	0.832085
	0.675931	0.829919
	0.6827	0.822151
	0.689472	0.810934
	0.696277	0.795642
	0.703206	0.774253
	0.710392	0.746477
	0.717832	0.71581
	0.725388	0.687156
	0.733001	0.660843
	0.740757	0.632453
	0.748689	0.601363
	0.756612	0.574308
	0.764347	0.555549
	0.772006	0.538304
	0.779924	0.512013
	0.788408	0.475403
	0.797476	0.437822
	0.806896	0.408792
	0.816465	0.390047
	0.82617	0.377749
	0.836181	0.368556
	0.846744	0.361576
	0.857982	0.355667
	0.869755	0.347297
10	0.110958	-0.103852
	0.120426	-0.114065
	0.130138	-0.120174
	0.140174	-0.121321
	0.150494	-0.119281
	0.160999	-0.116693
	0.17166	-0.114705
	0.182563	-0.11234
	0.193839	-0.108114
	0.205535	-0.101848
	0.217579	-0.0944038
	0.229911	-0.0862138
	0.242549	-0.0771775
	0.255438	-0.0679346
	0.268331	-0.0600588
	0.280998	-0.0545972
	0.293538	-0.0508989
	0.306326	-0.0471202
	0.319639	-0.0418011
	0.333423	-0.0347868
	0.347477	-0.0266881
	0.361737	-0.0179991
	0.376211	-0.00902933
	0.390801	-0.000221634
	0.405336	0.00796642
	0.419724	0.0152188
	0.433948	0.0211732
	0.448059	0.0257321
	0.462207	0.0297906
	0.476463	0.0347654
	0.490548	0.0411852
	0.503958	0.0483537
	0.516481	0.0554943
	0.528402	0.0629315
	0.540161	0.0719601
	0.551955	0.0838086
	0.563748	0.099356
	0.575615	0.120261
	0.587894	0.149737
	0.600857	0.190479
	0.614207	0.240737
	0.627098	0.293516
	0.638756	0.341232
	0.649018	0.381066
	0.658229	0.415503
	0.666813	0.448782
	0.675036	0.483376
	0.683005	0.518605
	0.690758	0.5511
	0.698343	0.576498
	0.705839	0.591242
	0.713309	0.593189
	0.720773	0.582127
	0.728237	0.561375
	0.735703	0.537203
	0.743179	0.514044
	0.750718	0.491059
	0.758451	0.463907
	0.766561	0.428799
	0.775157	0.385534
	0.784184	0.338598
	0.793449	0.295289
	0.802784	0.260797
	0.812157	0.234785
	0.821601	0.213682
	0.831091	0.194973
	0.84057	0.178222
	0.850075	0.16386
	0.859726	0.152689
	0.869565	0.145864
	0.879463	0.14411
	0.889279	0.146477
	0.89911	0.149782
	0.909356	0.149624
	0.920513	0.142836
	0.932826	0.129471
11	0.110497	-0.228973
	0.119658	-0.240537
	0.128765	-0.265038
	0.137936	-0.298328
	0.147327	-0.329011
	0.157067	-0.348472
	0.167275	-0.353924
	0.178167	-0.344507
	0.190008	-0.319201
	0.202738	-0.280638
	0.215765	-0.236848
	0.228468	-0.194667
	0.240907	-0.152253
	0.253752	-0.10132
	0.26753	-0.0368851
	0.282016	0.037846
	0.296551	0.117317
	0.31081	0.201035
	0.324889	0.291907
	0.338746	0.388679
	0.351987	0.484012
	0.364241	0.57057
	0.375443	0.645385
	0.38572	0.707976
	0.395268	0.75831
	0.404348	0.797551
	0.413177	0.827175
	0.421799	0.845654
	0.430143	0.847542
	0.438219	0.826482
	0.446155	0.779407
	0.454053	0.710763
	0.461946	0.634251
	0.469838	0.56605
	0.477731	0.513467
	0.485623	0.472794
	0.493516	0.437641
	0.501409	0.407028
	0.509301	0.387488
	0.517194	0.388887
	0.525086	0.415514
	0.532979	0.45999
	0.540872	0.507316
	0.548777	0.543641
	0.556751	0.560378
	0.56492	0.555333
	0.573329	0.535283
	0.581793	0.514804
	0.590112	0.505208
	0.598325	0.502543
	0.606649	0.489452
	0.615391	0.450216
	0.624719	0.385491
	0.634359	0.314641
	0.643847	0.260687
	0.653009	0.231366
	0.662016	0.219344
	0.671117	0.216285
	0.68045	0.218323
	0.689987	0.222184
	0.699611	0.224757
	0.709213	0.226984
	0.718716	0.233896
	0.728085	0.249129
	0.737414	0.269159
	0.74698	0.28381
	0.757056	0.28562
	0.767593	0.278411
	0.778315	0.271305
	0.789204	0.266489
	0.800579	0.258952
	0.812728	0.244228
	0.82564	0.221654
	0.839034	0.192793
	0.852483	0.16049
	0.865498	0.129909
12	0.103436	-0.0869485
	0.112056	-0.0940948
	0.120675	-0.101475
	0.129295	-0.111435
	0.137917	-0.123494
	0.146563	-0.135292
	0.155331	-0.143186
	0.164454	-0.142049
	0.174237	-0.126968
	0.184769	-0.0978362
	0.195644	-0.0623552
	0.206197	-0.032272
	0.216094	-0.0153085
	0.225562	-0.0105773
	0.235083	-0.0110155
	0.244978	-0.0100359
	0.255233	-0.00724794
	0.265605	-0.00944705
	0.275795	-0.0258494
	0.285579	-0.0603099
	0.294883	-0.10783
	0.303807	-0.158696
	0.312547	-0.203918
	0.321333	-0.237107
	0.330457	-0.255287
	0.340245	-0.260189
	0.35083	-0.257221
	0.36202	-0.251628
	0.373698	-0.244865
	0.386394	-0.233402
	0.401223	-0.211012
	0.419118	-0.173763
	0.440131	-0.1232
	0.463555	-0.0638751
	0.48866	0.00200041
	0.515168	0.0771988
	0.542573	0.167372
	0.569064	0.274854
	0.591924	0.390423
	0.609384	0.49412
	0.621778	0.572851
	0.630911	0.630665
	0.63864	0.680548
	0.646045	0.734593
	0.653535	0.799207
	0.661083	0.874266
	0.66845	0.954958
	0.675421	1.03228
	0.681957	1.08758
	0.688198	1.08878
	0.694321	1.01465
	0.700419	0.896683
	0.706514	0.79844
	0.71261	0.750425
	0.718705	0.739986
	0.7248	0.743716
	0.730895	0.750411
	0.73699	0.761704
	0.743085	0.783092
	0.74918	0.818561
	0.755275	0.868227
	0.761371	0.925999
	0.767477	0.980786
	0.77365	1.02079
	0.78002	1.03651
	0.786705	1.02284
	0.793694	0.981712
	0.800956	0.921506
	0.808574	0.851525
	0.816681	0.777533
	0.825321	0.702175
	0.834452	0.627082
	0.844028	0.553957
	0.854067	0.484404
	0.864856	0.41831
	0.877193	0.352728
13	0.10667	-0.159731
	0.115526	-0.202065
	0.124474	-0.231642
	0.133623	-0.243288
	0.142982	-0.241029
	0.152432	-0.232814
	0.161862	-0.225112
	0.171281	-0.220359
	0.180772	-0.217294
	0.190419	-0.212725
	0.200273	-0.203171
	0.210364	-0.18646
	0.220692	-0.163339
	0.231236	-0.137215
	0.241972	-0.111474
	0.252862	-0.087546
	0.263812	-0.0654503
	0.274725	-0.0445825
	0.285615	-0.0236211
	0.296561	-0.00146574
	0.307541	0.0210362
	0.318432	0.0414601
	0.329161	0.0581049
	0.339771	0.0712127
	0.350328	0.0822306
	0.360848	0.0925864
	0.371297	0.103016
	0.381613	0.113886
	0.391772	0.126187
	0.401818	0.141468
	0.411807	0.160406
	0.421734	0.18286
	0.431559	0.210452
	0.441281	0.247887
	0.45095	0.300049
	0.460606	0.367533
	0.470226	0.444761
	0.479746	0.521122
	0.4891	0.584546
	0.498248	0.627338
	0.507206	0.649439
	0.516041	0.655624
	0.524824	0.651013
	0.533609	0.638768
	0.542509	0.619316
	0.551819	0.590382
	0.56201	0.548208
	0.573479	0.489588
	0.5864	0.4139
	0.60068	0.32521
	0.61582	0.233619
	0.630945	0.152102
	0.645228	0.0894464
	0.658319	0.0467692
	0.670358	0.020003
	0.681742	0.00368918
	0.692925	-0.00704778
	0.7043	-0.0156465
	0.716071	-0.0234662
	0.728201	-0.0297377
	0.740529	-0.0326287
	0.752926	-0.031182
	0.765337	-0.0267736
	0.777749	-0.0226724
	0.790161	-0.02212
	0.802572	-0.0270158
	0.814972	-0.0381265
	0.827312	-0.0551727
	0.839476	-0.0760209
	0.851305	-0.096949
	0.862738	-0.115063
	0.873917	-0.130661
	0.885098	-0.146605
	0.896421	-0.16498
	0.90779	-0.184947
	0.919029	-0.204328
14	0.104705	-0.0647127
	0.113819	-0.0711828
	0.122883	-0.0773624
	0.1318	-0.0847998
	0.14063	-0.0936768
	0.149559	-0.100745
	0.158726	-0.103508
	0.168035	-0.10505
	0.177227	-0.111674
	0.186188	-0.125883
	0.195063	-0.143953
	0.204076	-0.160392
	0.213359	-0.172379
	0.222879	-0.17936
	0.232526	-0.180978
	0.242236	-0.177434
	0.252056	-0.170564
	0.262095	-0.162197
	0.272429	-0.151273
	0.283045	-0.133598
	0.293885	-0.104606
	0.304892	-0.0625228
	0.316018	-0.00898531
	0.327226	0.053215
	0.338483	0.12165
	0.349675	0.19288
	0.360619	0.262652
	0.371308	0.33119
	0.381984	0.405161
	0.392799	0.488484
	0.403476	0.573142
	0.413523	0.644636
	0.422702	0.694156
	0.431129	0.721618
	0.43907	0.731943
	0.446782	0.732763
	0.454428	0.732878
	0.462065	0.739444
	0.469709	0.754799
	0.477354	0.773307
	0.484985	0.782613
	0.492615	0.77391
	0.500261	0.752186
	0.507903	0.732448
	0.515537	0.72492
	0.523169	0.727917
	0.530827	0.732908
	0.538626	0.73073
	0.546804	0.714587
	0.555572	0.681768
	0.564946	0.634235
	0.574828	0.577674
	0.585112	0.51904
	0.595694	0.463031
	0.606496	0.410021
	0.61752	0.357935
	0.628789	0.306263
	0.640237	0.257745
	0.651757	0.215884
	0.663433	0.181835
	0.675554	0.154761
	0.688328	0.134024
	0.701678	0.119171
	0.715363	0.108402
	0.729178	0.0989747
	0.743022	0.0890814
	0.75687	0.0790699
	0.770718	0.0715062
	0.78454	0.0695022
	0.798262	0.0733544
	0.811779	0.0791269
	0.825158	0.0817577
	0.838911	0.0780573
	0.853844	0.0669817
	0.870316	0.0500308
	0.887639	0.0310081
15	0.108444	-0.170867
	0.112906	-0.184046
	0.117508	-0.192871
	0.122172	-0.198853
	0.126771	-0.203931
	0.131218	-0.209409
	0.135524	-0.215624
	0.139781	-0.222119
	0.144111	-0.227909
	0.148635	-0.23175
	0.153421	-0.232575
	0.158443	-0.230142
	0.163599	-0.225579
	0.168755	-0.221282
	0.173798	-0.21994
	0.17867	-0.223134
	0.183388	-0.230364
	0.188041	-0.239139
	0.192763	-0.246097
	0.197697	-0.248396
	0.202938	-0.244623
	0.208476	-0.235162
	0.214164	-0.222237
	0.219785	-0.209421
	0.225185	-0.200115
	0.23038	-0.195533
	0.235548	-0.193852
	0.240926	-0.191539
	0.246657	-0.185825
	0.252674	-0.176369
	0.258735	-0.165008
	0.264619	-0.154094
	0.270281	-0.144935
	0.275855	-0.13745
	0.281532	-0.130837
	0.28745	-0.124325
	0.293634	-0.117431
	0.300016	-0.109797
	0.306513	-0.100946
	0.31308	-0.0902504
	0.319728	-0.0771706
	0.326485	-0.0616356
	0.333344	-0.0443221
	0.340231	-0.0266271
	0.347008	-0.0103237
	0.353528	0.00300857
	0.359718	0.0127225
	0.36564	0.0197709
	0.371478	0.0266721
	0.377459	0.0362828
	0.38373	0.0499918
	0.39028	0.0669203
	0.396967	0.0849881
	0.403639	0.102851
	0.410225	0.120925
	0.41672	0.14076
	0.423127	0.163546
	0.429432	0.189244
	0.435638	0.217043
	0.4418	0.246392
	0.447992	0.277342
	0.454236	0.309973
	0.460465	0.343715
	0.466567	0.377384
	0.472455	0.409807
	0.478107	0.44031
	0.483539	0.468671
	0.488771	0.494816
	0.49382	0.518768
	0.498713	0.540918
	0.5035	0.562194
	0.508236	0.583674
	0.512954	0.605778
	0.517647	0.627857
	0.52229	0.648694
	0.526866	0.667424
	0.531377	0.683908
	0.535822	0.698211
	0.540171	0.709791
	0.544384	0.717282
	0.548442	0.719209
	0.552377	0.715043
	0.556242	0.705741
	0.560078	0.693369
	0.563906	0.680095
	0.567733	0.667266
	0.57156	0.655131
	0.575387	0.643166
	0.579213	0.630671
	0.58304	0.617369
	0.586866	0.603857
	0.590693	0.591729
	0.59452	0.583094
	0.598346	0.579577
	0.602173	0.581362
	0.606	0.58703
	0.609826	0.594364
	0.613653	0.601553
	0.61748	0.607867
	0.621306	0.613408
	0.625133	0.618421
	0.62896	0.623001
	0.632786	0.627494
	0.636613	0.632976
	0.64044	0.641021
	0.644266	0.652695
	0.648094	0.667527
	0.651926	0.683323
	0.655777	0.696963
	0.659678	0.705639
	0.663677	0.707848
	0.667807	0.703827
	0.672048	0.695332
	0.676337	0.6848
	0.680617	0.674084
	0.68488	0.663458
	0.689177	0.651589
	0.69359	0.636533
	0.698204	0.616992
	0.703059	0.592986
	0.70814	0.565689
	0.713384	0.53671
	0.718725	0.507364
	0.724112	0.478338
	0.729517	0.449821
	0.734931	0.421786
	0.740359	0.394183
	0.745821	0.36692
	0.751358	0.33972
	0.75703	0.312065
	0.762899	0.28342
	0.768996	0.253684
	0.775302	0.2235
	0.781754	0.194142
	0.788271	0.167037
	0.794788	0.143283
	0.801263	0.123385
	0.807679	0.107161
	0.814051	0.0937975
	0.820414	0.082185
	0.82679	0.0715453
	0.833157	0.0619242
	0.839465	0.0540368
	0.845702	0.0485319
	0.851937	0.0452924
	0.858288	0.04336
	0.864844	0.0415367
	0.871594	0.0391405
	0.878426	0.03634
	0.885194	0.0339134
16	0.113532	-0.142681
	0.12406	-0.134729
	0.134823	-0.123417
	0.146021	-0.108521
	0.157717	-0.0921588
	0.169723	-0.0783613
	0.181767	-0.0701247
	0.193793	-0.0668158
	0.205947	-0.0654953
	0.218324	-0.0639762
	0.230854	-0.0618972
	0.243364	-0.059991
	0.255631	-0.0592088
	0.267439	-0.0600249
	0.278786	-0.0619172
	0.290046	-0.0631858
	0.301894	-0.0609028
	0.314988	-0.0515403
	0.329513	-0.0329616
	0.345013	-0.00600323
	0.360787	0.0266407
	0.376388	0.0630853
	0.391749	0.10391
	0.406979	0.15173
	0.422054	0.208528
	0.43659	0.272089
	0.450024	0.335778
	0.46209	0.393458
	0.472961	0.443284
	0.482897	0.485772
	0.492025	0.520808
	0.500484	0.548218
	0.508525	0.569967
	0.516361	0.589492
	0.524062	0.607622
	0.531616	0.620506
	0.539051	0.62321
	0.546437	0.615106
	0.553811	0.600805
	0.561185	0.585377
	0.568559	0.571288
	0.575933	0.561484
	0.583307	0.560011
	0.590684	0.565647
	0.598083	0.569333
	0.60557	0.561941
	0.613256	0.54212
	0.621227	0.515311
	0.629538	0.486679
	0.638254	0.456466
	0.647381	0.422905
	0.656768	0.386677
	0.666253	0.349383
	0.675934	0.309554
	0.686146	0.26412
	0.697035	0.214706
	0.708211	0.169731
	0.71906	0.137329
	0.729425	0.117055
	0.73975	0.100692
	0.750652	0.0801513
	0.762428	0.0533185
	0.774843	0.0237294
	0.787344	-0.00306261
	0.799438	-0.0223408
	0.810935	-0.0316709
	0.82198	-0.0321032
	0.832932	-0.0284914
	0.844155	-0.0272862
	0.855737	-0.0317734
	0.867321	-0.0383676
	0.878334	-0.0394762
	0.888495	-0.0312168
	0.898041	-0.0168643
	0.907464	-0.003279
	0.917232	0.0040804
17	0.106381	0.0551156
	0.115624	0.0856164
	0.124765	0.107551
	0.133672	0.108193
	0.14243	0.0869256
	0.151143	0.0549492
	0.15985	0.025753
	0.168556	0.00454655
	0.177263	-0.013038
	0.185977	-0.0324686
	0.194744	-0.0515704
	0.203674	-0.0612986
	0.212838	-0.0554598
	0.222081	-0.0379272
	0.231154	-0.0191463
	0.240001	-0.0068187
	0.248737	-0.00155945
	0.257446	-8.91933e-05
	0.266154	0.000737129
	0.274867	0.00354165
	0.283627	0.0114422
	0.292539	0.0264329
	0.301684	0.0452835
	0.310927	0.0588511
	0.320017	0.0586708
	0.32888	0.0448251
	0.337621	0.0259299
	0.346331	0.0111067
	0.355037	0.00342076
	0.363743	0.0010455
	0.37245	0.00238247
	0.381169	0.0094092
	0.389956	0.027014
	0.398937	0.058271
	0.408152	0.0989981
	0.417394	0.138139
	0.426421	0.165567
	0.435233	0.179115
	0.443957	0.183441
	0.452664	0.184098
	0.46137	0.184008
	0.470077	0
	0.478783	0
	0.487489	0
	0.496195	0
	0.504901	0
	0.513608	0.096442
	0.522314	0.0577168
	0.53102	0.0303837
	0.539726	0.0234017
	0.548432	0.0411365
	0.557138	0.0849888
	0.565845	0.154926
	0.574551	0.2499
	0.583257	0.365021
	0.591963	0.488024
	0.600669	0.604062
	0.609376	0.704668
	0.618082	0.786225
	0.626788	0.843496
	0.635497	0.87291
	0.644241	0.877627
	0.653163	0.863182
	0.662589	0.832314
	0.672941	0.785591
	0.684629	0.723685
	0.697929	0.64858
	0.712754	0.564704
	0.728752	0.47842
	0.7459	0.394342
	0.764632	0.314824
	0.784932	0.24449
	0.805569	0.18943
	0.824993	0.150601
	0.842988	0.12266
	0.86087	0.0993117
18	0.11558	0.0246697
	0.124867	0.0128615
	0.134147	0.00494365
	0.143431	0.00132936
	0.152724	0.000306585
	0.162059	0.000533125
	0.171506	0.00216297
	0.181134	0.0058795
	0.19094	0.0125006
	0.200826	0.0227551
	0.210642	0.0354758
	0.220281	0.0474287
	0.229734	0.0568617
	0.239071	0.0652645
	0.248364	0.0743452
	0.257648	0.0838798
	0.266928	0.0931685
	0.276207	0.10142
	0.285479	0.106669
	0.294738	0.107813
	0.303987	0.107382
	0.313227	0.109279
	0.322446	0.113892
	0.331623	0.116662
	0.340718	0.111264
	0.349701	0.0950602
	0.358596	0.0727888
	0.36746	0.0540357
	0.376326	0.0464205
	0.385204	0.0523043
	0.394115	0.070358
	0.40305	0.0959978
	0.41192	0.121016
	0.420652	0.138816
	0.429308	0.152319
	0.438058	0.173664
	0.447086	0.21419
	0.456437	0.274538
	0.465903	0.342983
	0.475139	0.4026
	0.483936	0.44216
	0.492384	0.462157
	0.50069	0.471097
	0.508967	0.477382
	0.517242	0.485976
	0.525516	0.499698
	0.533791	0.518423
	0.542065	0.537882
	0.550339	0.553866
	0.558614	0.56769
	0.566888	0.584856
	0.575164	0.60849
	0.583452	0.635596
	0.591808	0.658985
	0.60035	0.672183
	0.609136	0.673672
	0.618094	0.66657
	0.627153	0.654233
	0.636357	0.637488
	0.6458	0.615457
	0.655595	0.586364
	0.665944	0.547876
	0.677094	0.499495
	0.689088	0.445198
	0.701697	0.391938
	0.7147	0.344807
	0.728046	0.304679
	0.741678	0.270122
	0.755505	0.239575
	0.769687	0.211304
	0.784753	0.183024
	0.801202	0.153339
	0.819019	0.12331
	0.837708	0.0954633
	0.85674	0.0713402
	0.875868	0.0506757
19	0.128094	-0.0620189
	0.138781	-0.0648797
	0.149516	-0.0666007
	0.160365	-0.0677883
	0.171375	-0.0684653
	0.182525	-0.0686671
	0.193814	-0.0674881
	0.205405	-0.0619806
	0.217531	-0.0491551
	0.230163	-0.0296625
	0.242886	-0.00824001
	0.255195	0.0101266
	0.266889	0.0242145
	0.27814	0.0370467
	0.289286	0.053012
	0.300603	0.0749385
	0.312205	0.104132
	0.324048	0.141838
	0.33593	0.188376
	0.347572	0.241303
	0.358822	0.296908
	0.369734	0.353773
	0.380437	0.413407
	0.390951	0.477248
	0.401135	0.544185
	0.410811	0.611684
	0.419938	0.678338
	0.428636	0.743414
	0.437027	0.803857
	0.445125	0.853919
	0.452935	0.888945
	0.460561	0.908539
	0.468121	0.915617
	0.47567	0.913206
	0.483218	0.902816
	0.490767	0.884769
	0.498325	0.858227
	0.505942	0.820855
	0.51373	0.769905
	0.521791	0.705342
	0.530096	0.632857
	0.538565	0.562244
	0.547183	0.500716
	0.555985	0.44865
	0.564975	0.402221
	0.574119	0.357735
	0.58341	0.312957
	0.59288	0.267431
	0.602516	0.223805
	0.612206	0.187607
	0.621787	0.163736
	0.631176	0.152521
	0.640459	0.148918
	0.64986	0.14576
	0.659609	0.138674
	0.669779	0.128115
	0.680258	0.116803
	0.690881	0.106016
	0.701548	0.0950542
	0.712222	0.0836779
	0.722896	0.0737469
	0.733571	0.0675333
	0.744245	0.0642084
	0.75492	0.0594486
	0.765596	0.0499383
	0.776289	0.0373481
	0.787057	0.0265422
	0.798009	0.0196519
	0.809205	0.0139488
	0.820486	0.00753344
	0.831514	0.00434327
	0.84215	0.0100394
	0.852719	0.0244709
	0.863753	0.0426338
	0.875392	0.0620973
	0.887057	0.0842831
20	0.196583	0.0788151
	0.211703	0.0972422
	0.226402	0.113976
	0.240586	0.12782
	0.254147	0.13858
	0.267351	0.148259
	0.280645	0.160524
	0.294026	0.177495
	0.306923	0.19675
	0.318815	0.212862
	0.329675	0.221682
	0.339786	0.222889
	0.349471	0.220025
	0.359038	0.218768
	0.3687	0.223774
	0.378419	0.235491
	0.38796	0.249954
	0.397197	0.262564
	0.406191	0.271054
	0.414987	0.27481
	0.423553	0.275815
	0.431955	0.281783
	0.440376	0.303366
	0.448906	0.345118
	0.457382	0.400102
	0.465524	0.45413
	0.473205	0.496158
	0.480536	0.525423
	0.487704	0.548897
	0.494827	0.572628
	0.501941	0.59802
	0.509053	0.625339
	0.516122	0.653682
	0.523025	0.676844
	0.529671	0.686554
	0.536124	0.681146
	0.542505	0.667697
	0.548873	0.656745
	0.55524	0.656311
	0.561607	0.668708
	0.567973	0.690856
	0.57434	0.718073
	0.580707	0.747174
	0.587074	0.775358
	0.593441	0.799079
	0.599815	0.815721
	0.606236	0.82356
	0.612803	0.820005
	0.61962	0.803145
	0.626691	0.774256
	0.633984	0.736336
	0.641534	0.691429
	0.649414	0.640596
	0.65767	0.584209
	0.666346	0.521454
	0.675493	0.452324
	0.685072	0.380994
	0.694926	0.315019
	0.704897	0.260506
	0.714857	0.219595
	0.724652	0.191445
	0.734192	0.172833
	0.743666	0.158444
	0.753529	0.142918
	0.764187	0.123726
	0.775595	0.102784
	0.787254	0.0850003
	0.798705	0.07384
	0.809956	0.0681956
	0.821312	0.0645834
	0.83296	0.0614482
	0.844818	0.0590825
	0.856676	0.0562114
	0.868323	0.0496326
	0.879664	0.0372279
	0.890856	0.0204397
21	0.154601	0.0987375
	0.165788	0.0911372
	0.177003	0.0867154
	0.188259	0.0847664
	0.199635	0.0847806
	0.211036	0.0849481
	0.222158	0.0805444
	0.232816	0.0676869
	0.243204	0.0502021
	0.253732	0.0388898
	0.264658	0.0409788
	0.275842	0.0523728
	0.286876	0.0619505
	0.297505	0.0626332
	0.307811	0.0563182
	0.317991	0.047692
	0.328105	0.0375446
	0.338156	0.025402
	0.348317	0.015459
	0.358863	0.0141465
	0.369764	0.0212202
	0.380521	0.0280021
	0.390688	0.0262918
	0.400397	0.0170935
	0.410142	0.00915982
	0.420257	0.00865363
	0.430649	0.0130744
	0.441051	0.0178093
	0.451401	0.024574
	0.461828	0.0392796
	0.472403	0.0637952
	0.483018	0.0930488
	0.493458	0.119674
	0.503547	0.140039
	0.513271	0.155675
	0.522782	0.170054
	0.5323	0.186609
	0.542001	0.210126
	0.551949	0.245958
	0.561997	0.294148
	0.571784	0.345075
	0.580951	0.384548
	0.589473	0.404649
	0.597641	0.409643
	0.605753	0.412141
	0.613988	0.423171
	0.622377	0.445245
	0.630821	0.473759
	0.639169	0.501891
	0.647284	0.52324
	0.655143	0.533308
	0.662848	0.532329
	0.670503	0.527807
	0.678151	0.53152
	0.685798	0.550121
	0.693444	0.579333
	0.701091	0.609652
	0.708738	0.635517
	0.716385	0.656984
	0.724034	0.675418
	0.731698	0.690182
	0.739443	0.698782
	0.747391	0.698996
	0.755637	0.690008
	0.7642	0.671417
	0.773091	0.643022
	0.782318	0.606405
	0.791824	0.565142
	0.801552	0.522382
	0.811586	0.478687
	0.822152	0.433022
	0.833556	0.385049
	0.846143	0.336042
	0.860179	0.288609
	0.875671	0.245459
	0.892311	0.208147
22	0.118393	-0.164799
	0.127969	-0.17346
	0.13749	-0.180412
	0.14696	-0.185499
	0.156387	-0.188619
	0.165777	-0.189729
	0.175141	-0.188819
	0.184487	-0.185908
	0.193823	-0.181033
	0.203158	-0.174249
	0.212499	-0.165633
	0.221852	-0.155284
	0.231226	-0.143323
	0.240624	-0.129877
	0.250054	-0.11508
	0.259518	-0.099057
	0.269023	-0.0819286
	0.278572	-0.0638185
	0.288169	-0.0448566
	0.297816	-0.0251688
	0.307516	-0.00485603
	0.317269	0.016026
	0.327078	0.0374807
	0.336946	0.0595778
	0.346873	0.0824567
	0.356862	0.106332
	0.366917	0.131503
	0.377041	0.158364
	0.387239	0.187412
	0.397509	0.219229
	0.407846	0.254425
	0.418232	0.29351
	0.428635	0.336697
	0.439019	0.383673
	0.449342	0.433438
	0.459566	0.484269
	0.469656	0.533888
	0.479592	0.579787
	0.489359	0.619616
	0.498961	0.651512
	0.508414	0.674257
	0.517758	0.687249
	0.527053	0.690368
	0.53638	0.683808
	0.545835	0.667983
	0.555516	0.643504
	0.565506	0.611239
	0.575862	0.572387
	0.586617	0.528523
	0.59778	0.481544
	0.609344	0.433502
	0.62129	0.386361
	0.633588	0.34176
	0.646199	0.300862
	0.659081	0.26431
	0.672183	0.232279
	0.685453	0.204571
	0.698837	0.180732
	0.712277	0.160166
	0.725713	0.142233
	0.73909	0.126312
	0.752358	0.111835
	0.765472	0.0982935
	0.778403	0.0852299
	0.791125	0.0722317
	0.80362	0.0589295
	0.815871	0.045005
	0.827863	0.0301986
	0.839579	0.0143131
	0.851004	-0.00278129
	0.86212	-0.02113
	0.87291	-0.0406688
	0.883359	-0.061196
	0.893448	-0.0823433
	0.903164	-0.103545
	0.912492	-0.124017
23	0.128769	0.0354483
	0.139266	0.0405711
	0.150021	0.0344781
	0.160864	0.0176867
	0.171595	-0.00367457
	0.182071	-0.0215623
	0.192289	-0.032102
	0.202408	-0.0369442
	0.212586	-0.0387885
	0.222752	-0.0377163
	0.232651	-0.0321552
	0.242171	-0.0221199
	0.251465	-0.00995954
	0.260761	0.00259057
	0.270134	0.0163411
	0.279458	0.032389
	0.288574	0.0492711
	0.297413	0.0635697
	0.305947	0.0727744
	0.314175	0.076734
	0.322187	0.0764961
	0.330108	0.0728075
	0.338011	0.0664513
	0.345933	0.0595134
	0.353964	0.0549221
	0.362298	0.0535498
	0.371148	0.0520895
	0.380579	0.0453723
	0.390519	0.031811
	0.400837	0.0158162
	0.411385	0.00376379
	0.422054	-0.00149882
	0.432833	-0.00145019
	0.443773	0.00113427
	0.454787	0.00449322
	0.465567	0.00759928
	0.475848	0.00942355
	0.485722	0.0103788
	0.49556	0.0148859
	0.505722	0.0306302
	0.516337	0.0629702
	0.527293	0.110132
	0.538404	0.165534
	0.549522	0.225119
	0.560503	0.291055
	0.571158	0.367564
	0.581353	0.454571
	0.591166	0.546855
	0.600897	0.637285
	0.610899	0.718102
	0.621365	0.781855
	0.632236	0.825035
	0.643324	0.849802
	0.654485	0.861159
	0.66566	0.862555
	0.676837	0.852972
	0.688014	0.827916
	0.69919	0.783664
	0.710367	0.720809
	0.721545	0.644084
	0.732743	0.559933
	0.744038	0.476336
	0.755612	0.402515
	0.767701	0.343594
	0.780364	0.296128
	0.793287	0.252078
	0.805949	0.207578
	0.818025	0.166633
	0.82953	0.13534
	0.840575	0.114331
	0.851162	0.0989687
	0.861269	0.085071
	0.871045	0.0718599
	0.880831	0.0602266
	0.891026	0.0509498
	0.901954	0.044972

## Sheet: Fig3F,G
Figure 3 F,G
Curvature maxima (1/μm)	Distance of maxima from plus-end (μm)	Distance of maxima from microneedle (μm)		Curvature minima (1/μm)	Distance of minima from plus-end (μm)	Distance of minima from microneedle (μm)
1.50337	6.63503	0		-0.159597	2.842	3.79303
0.644257	3.96976	0		-0.262453	1.34048	2.62928
1.41271	6.51678	0		-0.181761	1.7402	4.77657
0.701317	7.0437	0		-0.151331	2.92494	4.11876
0.728511	5.11634	0		-0.310578	2.19963	2.91671
0.676311	7.01544	0		-0.117279	1.91618	5.09926
0.58013	6.01073	0		-0.199217	2.25173	3.75899
1.02162	7.71693	0		-0.107616	1.82423	5.8927
0.832085	5.13773	0		-0.118753	1.98001	3.15772
0.593189	10.6188	0		-0.121321	2.08674	8.53209
0.847542	3.19804	0		-0.353924	1.24366	1.95437
1.08878	5.60391	0		-0.260189	2.77058	2.83333
0.655624	6.37319	0		-0.243288	1.65026	4.72293
0.782613	4.3163	0		-0.180978	2.06945	2.24685
0.719209	4.77714	0		-0.248396	1.72201	3.05513
0.62321	6.51283	0		-0.142681	1.3717	5.14113
0.690368	6.02596	0		-0.189729	1.89538	4.13058
0.877627	4.63049	0		no negative curvature	no negative curvature	no negative curvature
0.673672	4.90716	0		no negative curvature	no negative curvature	no negative curvature
0.915617	4.14475	0		no negative curvature	no negative curvature	no negative curvature
0.862555	3.36686	0		no negative curvature	no negative curvature	no negative curvature
0.82356	5.55444	0		no negative curvature	no negative curvature	no negative curvature
0.698996	6.94027	0		no negative curvature	no negative curvature	no negative curvature

## Sheet: Fig3I
Figure 3I
Curvature minima over time of hold during "manipulate-and-hold" experiments
Exp #	Time of hold (s)	curvature minima (1/μm)
1	0	-0.235098
	7	-0.235098
	14	-0.0968173
	21	-0.00196567
	28	0.00409106
2	0	-0.176672
	7	-0.136672
	14	-0.0738171
	21	-0.0297148
	28	0.00209106
3	0	-0.201325
	5	-0.172998
	10	-0.172998
	15	0.0102485
	20	-0.00113605
4	0	-0.177703
	4	-0.172537
	8	-0.172537
	12	-0.148379
	16	-0.0676868
	20	-0.0532135
	24	-0.00194815
5	0	-0.208601
	7	-0.0847962
	14	-0.0847962
	21	0.0235804
	28	-0.00276948
