# Supplementary material for: Microneedle manipulation of the mammalian spindle reveals specialized, short-lived reinforcement near chromosomes
Source: eLife journal article supplement (doi:10.7554/elife.53807), 2020-03-19
Supplement: supp [file elife-53807-supp-v1.zip › elife_poa_e53807_Figure_4_figure_supplement_1_source_data_1.xlsx]

## Sheet: Fig4-figsupp1C
Figure 4-figure supplement 1C
PRC1 intensity per pixel in the spindle above background (A.U.)
Mock RNAi	PRC1 RNAi
631.87	188.494
621.459	81.9695
600	137.928
650.26	33.5077
598.453	161.753
542.012	220.978
393.02	68.0908
631.87	73.166
635.459	64.0768
620	90.4262		1	22365	115.752	2588787	2588787	2566422	28.6383
640.26	80.8586		2	805	112.323	90420	90420	89615
599.453	123.37
542.1	164.297
450	93.205
	81.3871
	471.849
	435.73
	64.7302
	80.3845
	64.3645
	277.252
	188.494
	91.9694
	150.936
