# Supplementary material for: Microneedle manipulation of the mammalian spindle reveals specialized, short-lived reinforcement near chromosomes
Source: eLife journal article supplement (doi:10.7554/elife.53807), 2020-03-19
Supplement: supp [file elife-53807-supp-v1.zip › elife_poa_e53807_Figure_4_figure_supplement_2_source_data_1.xlsx]

## Sheet: Fig4-figsupp2
Figure 4-figure supplement 2A			Figure 4-figure supplement 2B
Inter-kinetochore distance (μm)			Tubulin intensity per pixel above background (A.U.)
mock RNAi	PRC1 RNAi		Spindle middle region			Whole spindle
24.698	10.831		mock RNAi	PRC1 RNAi		mock RNAi	PRC1 RNAi
23.087	12.023		1124.32	606.124		1272.12	1125.8
25.647	14.391		752.393	1201.39		1037.1	842.88
23.364	15.699		892.038	1027.01		967.137	1498.81
21.934	11.377		1411.67	1178.38		1588.97	814.928
21.512	14.765		594.755	1240.56		926.657	1159.1
26.183	27.09		1435.75	503.097		1469.4	1578.48
21.932	14.063		1422.62	512.351		932.193	1669.43
25.829	17.667		1576.41	749.293		1343.56	1163.55
22.397	15.366		854.914	1188.63		1027.11	801.589
28.632	16.1		865.104	711.466		1082.67	1096.69
18.974	14.981		1231.44	1445.55		1500.6	998.869
22.132	14.472		752.393	533.014		1667.85	996.334
23.491	13.92			680.178			1199.63
16.159	14.826			798.756			1013.59
21.055	18.502			690.122			975.945
17.692	12.253			916.53			830.928
24.267	28.518			670.096			1059.1
23.279	14.193			845.495			1688.48
17.845	14.337			945.23			1579.45
20.742	18.118			923.284			1063.55
22.284	24.337			806.47			902.589
	27.25			775.393			999.485
	32.658			1221.2			1221.2
	29.126			773.788			1131.55
	23.5
	24.683
	18.375
	17.889
	9.981
	10.382
	15.598
	13.613
	11.205
	12.273
	19.805
	20.423
	23.57
	24.597
	14.08
	15.876
	23.783
	13.252
	20.26
