# Supplementary material for: Microneedle manipulation of the mammalian spindle reveals specialized, short-lived reinforcement near chromosomes
Source: eLife journal article supplement (doi:10.7554/elife.53807), 2020-03-19
Supplement: supp [file elife-53807-supp-v1.zip › elife_poa_e53807_Figure_4_source_data_1.xlsx]

## Sheet: Fig 4B
Figure 4B
PRC1 enrichment in the spindle along the pole-pole axis
Exp #	Distance along pole-pole axis	Intensity of PRC1, normalized to that of tubulin
1	0	0.71593
	0.105	0.709811
	0.21	0.701032
	0.315	0.699392
	0.42	0.699075
	0.525	0.695205
	0.63	0.69296
	0.735	0.690797
	0.84	0.690871
	0.945	0.688812
	1.05	0.687243
	1.155	0.685154
	1.26	0.675455
	1.365	0.66619
	1.47	0.652827
	1.575	0.646305
	1.68	0.653224
	1.785	0.66258
	1.89	0.666995
	1.995	0.673138
	2.1	0.679929
	2.205	0.691058
	2.31	0.696372
	2.415	0.701325
	2.52	0.700216
	2.625	0.697974
	2.73	0.703372
	2.835	0.715631
	2.94	0.729277
	3.045	0.731723
	3.15	0.731349
	3.255	0.733444
	3.36	0.741157
	3.465	0.758891
	3.57	0.779054
	3.675	0.804031
	3.78	0.828419
	3.885	0.845578
	3.99	0.85367
	4.095	0.865853
	4.2	0.875516
	4.305	0.898656
	4.41	0.928094
	4.515	0.945714
	4.62	0.955075
	4.725	0.972696
	4.83	0.989233
	4.935	0.998012
	5.04	1.00308
	5.145	1.00546
	5.25	1.00441
	5.355	1.00386
	5.46	0.996773
	5.565	0.98997
	5.67	0.984268
	5.775	0.986646
	5.88	0.982649
	5.985	0.974236
	6.09	0.969362
	6.195	0.950659
	6.3	0.932671
	6.405	0.92033
	6.51	0.9093
	6.615	0.901686
	6.72	0.890357
	6.825	0.866601
	6.93	0.838377
	7.035	0.821315
	7.14	0.808908
	7.245	0.806659
	7.35	0.804583
	7.455	0.799525
	7.56	0.798312
	7.665	0.789549
	7.77	0.785609
	7.875	0.782732
	7.98	0.784811
	8.085	0.776955
	8.19	0.762658
	8.295	0.75006
	8.4	0.746334
	8.505	0.748943
	8.61	0.757653
	8.715	0.770668
	8.82	0.773711
	8.925	0.764464
	9.03	0.749749
	9.135	0.74442
	9.24	0.742891
	9.345	0.74131
	9.45	0.733446
	9.555	0.729749
	9.66	0.728612
	9.765	0.736022
	9.87	0.753537
	9.975	0.774667
	10.08	0.788938
	10.185	0.783156
	10.29	0.781187
	10.395	0.788582
2	0	0.731458
	0.105	0.727358
	0.21	0.727957
	0.315	0.728389
	0.42	0.728763
	0.525	0.723644
	0.63	0.721774
	0.735	0.717741
	0.84	0.71029
	0.945	0.708937
	1.05	0.706607
	1.155	0.705825
	1.26	0.704189
	1.365	0.700585
	1.47	0.702844
	1.575	0.707494
	1.68	0.712191
	1.785	0.708392
	1.89	0.702649
	1.995	0.701486
	2.1	0.709052
	2.205	0.721122
	2.31	0.734712
	2.415	0.73659
	2.52	0.742539
	2.625	0.744511
	2.73	0.740648
	2.835	0.742088
	2.94	0.748332
	3.045	0.758547
	3.15	0.771845
	3.255	0.795581
	3.36	0.812433
	3.465	0.819009
	3.57	0.832839
	3.675	0.846989
	3.78	0.857005
	3.885	0.873936
	3.99	0.893992
	4.095	0.909852
	4.2	0.921518
	4.305	0.922386
	4.41	0.92814
	4.515	0.949384
	4.62	0.968262
	4.725	0.976972
	4.83	0.976293
	4.935	0.973692
	5.04	0.972293
	5.145	0.983336
	5.25	0.977338
	5.355	0.969227
	5.46	0.968146
	5.565	0.968246
	5.67	0.96626
	5.775	0.972571
	5.88	0.976307
	5.985	0.971617
	6.09	0.947567
	6.195	0.937416
	6.3	0.911593
	6.405	0.90813
	6.51	0.907753
	6.615	0.898519
	6.72	0.887342
	6.825	0.868314
	6.93	0.853293
	7.035	0.830346
	7.14	0.80456
	7.245	0.778066
	7.35	0.764188
	7.455	0.758616
	7.56	0.760351
	7.665	0.749171
	7.77	0.737415
	7.875	0.723583
	7.98	0.713251
	8.085	0.712068
	8.19	0.713528
	8.295	0.713338
	8.4	0.717933
	8.505	0.725483
	8.61	0.731763
	8.715	0.736736
	8.82	0.73484
	8.925	0.722172
	9.03	0.722458
	9.135	0.725318
	9.24	0.735467
	9.345	0.732791
	9.45	0.727897
	9.555	0.730882
	9.66	0.741261
	9.765	0.74652
	9.87	0.762044
	9.975	0.767193
	10.08	0.76262
	10.185	0.767961
	10.29	0.770318
3	0	0.70181
	0.105	0.6951
	0.21	0.690582
	0.315	0.684352
	0.42	0.681326
	0.525	0.675102
	0.63	0.677031
	0.735	0.682059
	0.84	0.688109
	0.945	0.694409
	1.05	0.689734
	1.155	0.677072
	1.26	0.668224
	1.365	0.662802
	1.47	0.655245
	1.575	0.650242
	1.68	0.654757
	1.785	0.659755
	1.89	0.662859
	1.995	0.660722
	2.1	0.657388
	2.205	0.654242
	2.31	0.659896
	2.415	0.664106
	2.52	0.679519
	2.625	0.694533
	2.73	0.706999
	2.835	0.714771
	2.94	0.717758
	3.045	0.720045
	3.15	0.729005
	3.255	0.741497
	3.36	0.738849
	3.465	0.745212
	3.57	0.748445
	3.675	0.753669
	3.78	0.753925
	3.885	0.760492
	3.99	0.772483
	4.095	0.787748
	4.2	0.79314
	4.305	0.800862
	4.41	0.806354
	4.515	0.814613
	4.62	0.825707
	4.725	0.832346
	4.83	0.834478
	4.935	0.833348
	5.04	0.836107
	5.145	0.846681
	5.25	0.85965
	5.355	0.870559
	5.46	0.869494
	5.565	0.867306
	5.67	0.870534
	5.775	0.872037
	5.88	0.874773
	5.985	0.862251
	6.09	0.852674
	6.195	0.855048
	6.3	0.856643
	6.405	0.852414
	6.51	0.850806
	6.615	0.837764
	6.72	0.8249
	6.825	0.825123
	6.93	0.824754
	7.035	0.827417
	7.14	0.827347
	7.245	0.822067
	7.35	0.808868
	7.455	0.80058
	7.56	0.792168
	7.665	0.792068
	7.77	0.786314
	7.875	0.781876
	7.98	0.773216
	8.085	0.767375
	8.19	0.762998
	8.295	0.7665
	8.4	0.764395
	8.505	0.76025
	8.61	0.747516
	8.715	0.737512
	8.82	0.73202
	8.925	0.727259
	9.03	0.722605
	9.135	0.719401
	9.24	0.721037
	9.345	0.719337
	9.45	0.712905
	9.555	0.701494
	9.66	0.686281
	9.765	0.681697
	9.87	0.681658
	9.975	0.67837
	10.08	0.679505
	10.185	0.675398
	10.29	0.668015
	10.395	0.665788
	10.5	0.664703
	10.605	0.663595
	10.71	0.672713
	10.815	0.678487
	10.92	0.684633
	11.025	0.688116
	11.13	0.684944
	11.235	0.678217
	11.34	0.683006
	11.445	0.691943
	11.55	0.692213
	11.655	0.690254
	11.76	0.699578
	11.865	0.711312
4	0	0.762253
	0.105	0.754344
	0.21	0.75464
	0.315	0.747768
	0.42	0.728381
	0.525	0.707181
	0.63	0.701054
	0.735	0.697821
	0.84	0.699596
	0.945	0.697533
	1.05	0.695871
	1.155	0.692001
	1.26	0.691882
	1.365	0.68904
	1.47	0.683417
	1.575	0.679606
	1.68	0.675523
	1.785	0.671308
	1.89	0.670524
	1.995	0.66667
	2.1	0.67223
	2.205	0.675609
	2.31	0.682067
	2.415	0.679242
	2.52	0.675717
	2.625	0.677665
	2.73	0.683805
	2.835	0.69724
	2.94	0.710858
	3.045	0.711578
	3.15	0.718719
	3.255	0.71913
	3.36	0.719881
	3.465	0.727154
	3.57	0.736117
	3.675	0.74824
	3.78	0.760582
	3.885	0.785356
	3.99	0.801521
	4.095	0.809309
	4.2	0.826668
	4.305	0.842989
	4.41	0.855834
	4.515	0.873737
	4.62	0.895677
	4.725	0.916118
	4.83	0.928135
	4.935	0.928174
	5.04	0.936109
	5.145	0.960503
	5.25	0.975905
	5.355	0.98459
	5.46	0.981767
	5.565	0.978697
	5.67	0.979229
	5.775	0.990211
	5.88	0.984657
	5.985	0.978709
	6.09	0.979369
	6.195	0.978618
	6.3	0.97445
	6.405	0.982384
	6.51	0.983708
	6.615	0.976596
	6.72	0.949691
	6.825	0.938448
	6.93	0.912063
	7.035	0.911578
	7.14	0.907267
	7.245	0.897044
	7.35	0.882566
	7.455	0.862843
	7.56	0.847373
	7.665	0.821213
	7.77	0.791793
	7.875	0.762739
	7.98	0.746577
	8.085	0.741737
	8.19	0.741092
	8.295	0.726805
	8.4	0.713426
	8.505	0.697623
	8.61	0.687643
	8.715	0.683857
	8.82	0.684266
	8.925	0.682358
	9.03	0.687242
	9.135	0.694534
	9.24	0.702741
	9.345	0.707612
	9.45	0.704008
	9.555	0.690324
	9.66	0.693184
	9.765	0.699165
	9.87	0.70678
	9.975	0.700335
	10.08	0.697563
	10.185	0.702137
	10.29	0.71555
	10.395	0.724187
	10.5	0.740631
	10.605	0.744324
	10.71	0.739281
	10.815	0.744215
	10.92	0.749383
	11.025	0.757083
	11.13	0.756617
	11.235	0.755392
	11.34	0.769673
	11.445	0.779797
	11.55	0.78675
	11.655	0.791645
5	0	0.730925
	0.105	0.724275
	0.21	0.714481
	0.315	0.70639
	0.42	0.706393
	0.525	0.704725
	0.63	0.701043
	0.735	0.699641
	0.84	0.699918
	0.945	0.70035
	1.05	0.699444
	1.155	0.696328
	1.26	0.695564
	1.365	0.686574
	1.47	0.677033
	1.575	0.665713
	1.68	0.660324
	1.785	0.662946
	1.89	0.669603
	1.995	0.673909
	2.1	0.680426
	2.205	0.686968
	2.31	0.69506
	2.415	0.700858
	2.52	0.703878
	2.625	0.703222
	2.73	0.703974
	2.835	0.708554
	2.94	0.721109
	3.045	0.731095
	3.15	0.732727
	3.255	0.733105
	3.36	0.735342
	3.465	0.740776
	3.57	0.75799
	3.675	0.778809
	3.78	0.802719
	3.885	0.829808
	3.99	0.847834
	4.095	0.860455
	4.2	0.871372
	4.305	0.879363
	4.41	0.89792
	4.515	0.924078
	4.62	0.938537
	4.725	0.949852
	4.83	0.967488
	4.935	0.981731
	5.04	0.993791
	5.145	0.994334
	5.25	0.997333
	5.355	0.994442
	5.46	0.994029
	5.565	0.991502
	5.67	0.984281
	5.775	0.982183
	5.88	0.985698
	5.985	0.979824
	6.09	0.973384
	6.195	0.964187
	6.3	0.945865
	6.405	0.929766
	6.51	0.918992
	6.615	0.905934
	6.72	0.899011
	6.825	0.888778
	6.93	0.869143
	7.035	0.845766
	7.14	0.826279
	7.245	0.814842
	7.35	0.80912
	7.455	0.809541
	7.56	0.806175
	7.665	0.804102
	7.77	0.796344
	7.875	0.797963
	7.98	0.797523
	8.085	0.796749
	8.19	0.784614
	8.295	0.771131
	8.4	0.758303
	8.505	0.75632
	8.61	0.760781
	8.715	0.76572
	8.82	0.778935
	8.925	0.779756
	9.03	0.772072
	9.135	0.758366
	9.24	0.755663
	9.345	0.752886
	9.45	0.752218
	9.555	0.746977
	9.66	0.742358
	9.765	0.742246
	9.87	0.749243
	9.975	0.765135
	10.08	0.783672
	10.185	0.797254
	10.29	0.794977
	10.395	0.791948
	10.5	0.796453
	10.605	0.801353
	10.71	0.803661
	10.815	0.814452
	10.92	0.821412
	11.025	0.823123
	11.13	0.827037
6	0	0.685185
	0.105	0.684573
	0.21	0.690677
	0.315	0.692157
	0.42	0.694996
	0.525	0.695723
	0.63	0.697065
	0.735	0.695916
	0.84	0.689721
	0.945	0.683905
	1.05	0.679551
	1.155	0.674001
	1.26	0.669142
	1.365	0.66498
	1.47	0.66718
	1.575	0.672695
	1.68	0.678625
	1.785	0.685104
	1.89	0.679885
	1.995	0.667075
	2.1	0.658169
	2.205	0.653277
	2.31	0.646235
	2.415	0.641651
	2.52	0.647933
	2.625	0.65268
	2.73	0.654326
	2.835	0.653114
	2.94	0.649442
	3.045	0.646266
	3.15	0.651124
	3.255	0.656527
	3.36	0.67342
	3.465	0.689523
	3.57	0.701841
	3.675	0.710391
	3.78	0.71507
	3.885	0.717007
	3.99	0.726419
	4.095	0.738085
	4.2	0.734738
	4.305	0.742281
	4.41	0.746137
	4.515	0.752244
	4.62	0.752256
	4.725	0.759455
	4.83	0.772262
	4.935	0.788104
	5.04	0.792337
	5.145	0.800107
	5.25	0.805382
	5.355	0.814909
	5.46	0.827015
	5.565	0.833458
	5.67	0.837362
	5.775	0.836131
	5.88	0.839905
	5.985	0.848995
	6.09	0.863286
	6.195	0.873208
	6.3	0.869614
	6.405	0.867348
	6.51	0.872132
	6.615	0.873098
	6.72	0.873448
	6.825	0.860774
	6.93	0.85082
	7.035	0.853384
	7.14	0.852531
	7.245	0.850246
	7.35	0.846433
	7.455	0.833504
	7.56	0.821394
	7.665	0.82135
	7.77	0.820891
	7.875	0.824452
	7.98	0.823353
	8.085	0.816364
	8.19	0.802288
	8.295	0.7943
	8.4	0.786932
	8.505	0.786325
	8.61	0.781733
	8.715	0.776578
	8.82	0.769251
	8.925	0.761536
	9.03	0.75787
	9.135	0.761197
	9.24	0.758275
	9.345	0.754294
	9.45	0.742939
	9.555	0.730564
	9.66	0.725622
	9.765	0.720021
	9.87	0.715026
	9.975	0.711176
	10.08	0.711333
	10.185	0.70875
	10.29	0.704114
	10.395	0.692846
	10.5	0.678357
	10.605	0.675073
	10.71	0.673645
	10.815	0.669138
	10.92	0.670279
	11.025	0.666647
	11.13	0.660338
	11.235	0.659031
	11.34	0.655767
	11.445	0.653904
	11.55	0.663108
	11.655	0.669049
	11.76	0.675371
	11.865	0.677474
	11.97	0.674556
	12.075	0.668395
	12.18	0.673686
	12.285	0.681628
	12.39	0.680025
	12.495	0.678041
	12.6	0.68923
	12.705	0.702173
	12.81	0.713018
	12.915	0.718543
	13.02	0.727901

## Sheet: Fig4E
Figure 4E
Curvature along k-fiber
Exp #	Normalized position along k-fiber	Curvature (1/μm)
1	0.143081	-0.00295794
	0.154997	0.000911533
	0.167263	0.00740678
	0.179806	0.0162463
	0.192501	0.0258582
	0.205152	0.0336762
	0.217505	0.0377286
	0.229422	0.0387484
	0.240975	0.0399623
	0.252343	0.0442634
	0.263718	0.0521736
	0.275282	0.0621627
	0.287087	0.0721276
	0.298906	0.0807257
	0.310343	0.0875402
	0.321208	0.092381
	0.331696	0.0954887
	0.34221	0.0986551
	0.353034	0.104449
	0.364066	0.113148
	0.374839	0.122081
	0.384964	0.129372
	0.394568	0.137067
	0.404167	0.149618
	0.414126	0.169489
	0.424237	0.194684
	0.433956	0.221368
	0.443081	0.248759
	0.451893	0.280048
	0.460768	0.31897
	0.469896	0.367607
	0.479203	0.426491
	0.488359	0.492573
	0.496972	0.557246
	0.504951	0.611927
	0.512555	0.656482
	0.520044	0.698155
	0.527475	0.742172
	0.534757	0.786318
	0.541864	0.824518
	0.548883	0.851861
	0.555883	0.86494
	0.562884	0.860507
	0.569902	0.836581
	0.57698	0.796096
	0.584161	0.748853
	0.591445	0.705597
	0.598834	0.667683
	0.606417	0.62652
	0.614365	0.574743
	0.622808	0.513756
	0.631717	0.45001
	0.640943	0.389547
	0.650274	0.337788
	0.659486	0.299268
	0.668446	0.274961
	0.677203	0.261837
	0.685963	0.25438
	0.695019	0.24594
	0.704653	0.231935
	0.714954	0.213347
	0.725692	0.195617
	0.736475	0.183673
	0.747101	0.177818
	0.757783	0.173311
	0.769006	0.163643
	0.781073	0.145303
	0.793836	0.119753
	0.807035	0.0903828
	0.820679	0.0592174
	0.834766	0.028051
	0.848922	2.06779e-07
	0.862718	-0.0228371
	0.876166	-0.0419792
	0.889562	-0.0607761
	0.902958	-0.0801815
2	0.138994	0.0306765
	0.150145	0.0340066
	0.160935	0.032456
	0.171627	0.0294198
	0.182475	0.0275898
	0.193663	0.0293084
	0.205146	0.0339985
	0.21662	0.0364526
	0.227802	0.0313089
	0.238698	0.0197689
	0.249594	0.0100924
	0.260842	0.0118598
	0.272598	0.0289226
	0.284666	0.0553466
	0.296625	0.0798179
	0.30812	0.0960655
	0.318975	0.106495
	0.329209	0.117208
	0.339144	0.135432
	0.349342	0.170313
	0.360218	0.228352
	0.371554	0.304743
	0.382576	0.383296
	0.392696	0.448341
	0.402046	0.497503
	0.411253	0.544418
	0.42089	0.607497
	0.430917	0.691393
	0.440559	0.781796
	0.44917	0.86055
	0.45694	0.919394
	0.4644	0.959157
	0.471807	0.983286
	0.47921	0.994598
	0.486613	0.996053
	0.494016	0.991695
	0.50142	0.984484
	0.508823	0.972874
	0.516229	0.950118
	0.523665	0.909038
	0.53125	0.850221
	0.539194	0.782288
	0.547618	0.713211
	0.556469	0.645386
	0.565679	0.57729
	0.575186	0.507618
	0.584778	0.439355
	0.59415	0.378939
	0.60327	0.328431
	0.612536	0.280023
	0.622494	0.224032
	0.633259	0.162859
	0.644247	0.110928
	0.654757	0.0798692
	0.664632	0.0677811
	0.674244	0.0630352
	0.684063	0.0558156
	0.694244	0.0452926
	0.704507	0.0364091
	0.71457	0.030828
	0.724567	0.0239894
	0.734847	0.0121252
	0.74554	-0.00215409
	0.756462	-0.0137532
	0.767402	-0.0221067
	0.778228	-0.0313895
	0.788749	-0.0432164
	0.798811	-0.0528333
	0.808536	-0.0548391
	0.81826	-0.0505055
	0.828231	-0.0457678
	0.838431	-0.0381987
	0.848634	-0.00669686
	0.858616	0.070781
	0.868353	0.174151
	0.878068	0.253192
3	0.126651	0.00488513
	0.137884	0.00673998
	0.149231	0.0145332
	0.160271	0.0250459
	0.170796	0.0352185
	0.180927	0.0442223
	0.190957	0.0531537
	0.20108	0.062989
	0.211279	0.0737337
	0.221478	0.0859209
	0.231743	0.101761
	0.242224	0.124142
	0.252978	0.155268
	0.263901	0.195942
	0.27477	0.244366
	0.285287	0.294635
	0.295203	0.33797
	0.304524	0.368353
	0.31352	0.38782
	0.322481	0.404897
	0.331575	0.427148
	0.340807	0.455263
	0.350046	0.483281
	0.359118	0.502853
	0.367906	0.508106
	0.376445	0.499243
	0.384861	0.48269
	0.393244	0.467537
	0.401624	0.46115
	0.410004	0.465859
	0.418383	0.478119
	0.426763	0.492125
	0.435142	0.504711
	0.443522	0.51548
	0.451901	0.524061
	0.460282	0.530097
	0.468677	0.53369
	0.477151	0.53301
	0.485833	0.52402
	0.494811	0.504857
	0.504031	0.47832
	0.513377	0.448703
	0.522797	0.417708
	0.532342	0.383545
	0.542121	0.343034
	0.552169	0.295877
	0.562338	0.247436
	0.572425	0.205244
	0.582405	0.172864
	0.592415	0.14926
	0.602556	0.13252
	0.612828	0.121092
	0.623216	0.11274
	0.633721	0.105108
	0.644326	0.097389
	0.654992	0.0908771
	0.665662	0.0880059
	0.676286	0.0899543
	0.686868	0.0946327
	0.697509	0.0980855
	0.708328	0.0981678
	0.71935	0.0957091
	0.730497	0.0921811
	0.741711	0.0875962
	0.75301	0.0809846
	0.764409	0.0722694
	0.775872	0.062974
	0.787378	0.0546228
	0.798966	0.0469565
	0.810671	0.0386443
	0.822496	0.0289983
	0.834458	0.0181028
	0.846566	0.00653957
	0.858739	-0.00417059
	0.870816	-0.0119203
	0.882644	-0.0152211
4	0.138701	-0.033574
	0.149062	-0.0340657
	0.160588	-0.0250134
	0.17344	-0.00721301
	0.187134	0.0138563
	0.201021	0.0330378
	0.214541	0.0463617
	0.227228	0.0501573
	0.238965	0.0444307
	0.250175	0.0372125
	0.261485	0.0401173
	0.273241	0.057863
	0.2854	0.085102
	0.297726	0.113176
	0.309963	0.137125
	0.321899	0.157152
	0.333397	0.176041
	0.344407	0.195827
	0.355048	0.217896
	0.365604	0.245959
	0.376221	0.284178
	0.386646	0.331088
	0.396505	0.380843
	0.405808	0.431
	0.414895	0.485019
	0.424019	0.54672
	0.433126	0.614344
	0.44194	0.68066
	0.45024	0.739109
	0.458064	0.790553
	0.465633	0.84195
	0.473117	0.89589
	0.480494	0.94487
	0.487628	0.980026
	0.494505	1.00172
	0.501246	1.01739
	0.507951	1.03175
	0.514651	1.04236
	0.521351	1.04369
	0.528051	1.03373
	0.534756	1.01501
	0.541491	0.989233
	0.548304	0.954632
	0.55521	0.911467
	0.562175	0.86607
	0.569199	0.824491
	0.576394	0.784193
	0.583962	0.736196
	0.592077	0.674474
	0.600706	0.602551
	0.60956	0.531991
	0.618288	0.473887
	0.626775	0.431071
	0.635194	0.398191
	0.643818	0.367547
	0.652792	0.334295
	0.662061	0.29851
	0.671482	0.264403
	0.68097	0.23679
	0.69056	0.217198
	0.700411	0.203262
	0.710725	0.191191
	0.721588	0.178341
	0.732868	0.164215
	0.744328	0.150045
	0.755797	0.137714
	0.767174	0.128458
	0.778379	0.1218
	0.789415	0.115518
	0.800413	0.107094
	0.81149	0.0958598
	0.822621	0.0835864
	0.833814	0.0719854
	0.845369	0.0596945
	0.857767	0.0427382
	0.871253	0.0180598
5	0.271773	0.0879773
	0.289528	0.101497
	0.305627	0.115466
	0.321812	0.135315
	0.339034	0.166814
	0.3567	0.21271
	0.373499	0.271141
	0.388855	0.338854
	0.403102	0.415457
	0.416524	0.501449
	0.428996	0.594342
	0.440467	0.690007
	0.451077	0.78431
	0.460753	0.870691
	0.469253	0.94178
	0.476679	0.994851
	0.483505	1.02963
	0.490103	1.04257
	0.496624	1.02861
	0.503118	0.985647
	0.509605	0.912905
	0.516091	0.810825
	0.522577	0.685903
	0.529063	nan
	0.535549	nan
	0.542035	0.272019
	0.548522	0.164198
	0.555008	0.0934988
	0.561494	0.0586839
	0.56798	0.055528
	0.574466	0.0814227
	0.580952	0.128685
	0.587439	0.181155
	0.593925	0.222713
	0.600411	0.247285
	0.606897	0.259781
	0.613383	0.270869
	0.619869	0.291554
	0.626355	0.327411
	0.632843	0.371978
	0.639342	0.405357
	0.645914	0.40339
	0.652683	0.352883
	0.659688	0.26381
	0.666722	0.169289
	0.673547	0.107139
	0.680153	0.0948376
	0.686671	0.119535
	0.693183	0.148061
	0.699758	0.146522
	0.706524	0.0981909
	0.713525	0.0141294
	0.720559	-0.0689928
	0.727387	-0.108986
	0.733996	-0.0849261
	0.740515	-0.0112013
	0.747027	0.0693384
	0.7536	0.111026
	0.760362	0.0943051
	0.767359	0.0379524
	0.774393	-0.0140632
	0.781224	-0.0243151
	0.787837	0.0139739
	0.794357	0.0791654
	0.800868	0.139426
	0.80744	0.170657
	0.814198	0.168313
	0.821191	0.150336
	0.828232	0.147363
	0.8351	0.182597
	0.8418	0.255079
	0.848476	0.339914
	0.855282	0.406451
	0.862285	0.441167
	0.869328	0.455059
	0.876199	0.46883
6	0.126254	0.0933529
	0.137049	0.130271
	0.147498	0.164781
	0.157772	0.195574
	0.168025	0.218398
	0.178181	0.226625
	0.188085	0.219279
	0.19776	0.208512
	0.207381	0.211776
	0.217049	0.232133
	0.226676	0.253712
	0.236106	0.2597
	0.245257	0.248945
	0.254176	0.234613
	0.26301	0.231761
	0.271929	0.247895
	0.281039	0.283022
	0.290342	0.334596
	0.299709	0.396921
	0.308873	0.456045
	0.317629	0.495694
	0.326063	0.51385
	0.334434	0.52743
	0.342938	0.55477
	0.351544	0.595231
	0.359999	0.630126
	0.368161	0.640635
	0.376133	0.620492
	0.384045	0.574792
	0.391948	0.512736
	0.399851	0.444843
	0.407753	0.385846
	0.415656	0.352128
	0.423559	0.348834
	0.431461	0.362708
	0.439364	0.37524
	0.447267	0.383447
	0.455169	0.402588
	0.463072	0.446685
	0.470975	0.511206
	0.478877	0.57895
	0.48678	0.638424
	0.494685	0.689328
	0.502612	0.731235
	0.510654	0.755318
	0.518977	0.753153
	0.527629	0.729194
	0.536439	0.697445
	0.545295	0.665212
	0.554334	0.62602
	0.563765	0.572149
	0.573506	0.509167
	0.583154	0.452428
	0.5925	0.40967
	0.601787	0.373875
	0.611409	0.336489
	0.621521	0.300263
	0.631937	0.272912
	0.64248	0.25402
	0.653172	0.23634
	0.664074	0.217705
	0.675145	0.204589
	0.686296	0.20263
	0.697469	0.208092
	0.708647	0.211464
	0.719843	0.207922
	0.731126	0.201295
	0.742634	0.197346
	0.754514	0.196482
	0.766752	0.195361
	0.779141	0.192954
	0.791531	0.191505
	0.804129	0.192513
	0.81744	0.194103
	0.831817	0.193117
	0.847013	0.188971
7	0.117666	-0.170252
	0.12804	-0.155372
	0.138691	-0.145512
	0.149867	-0.138718
	0.161508	-0.133882
	0.173299	-0.130936
	0.185101	-0.128576
	0.197145	-0.12337
	0.209664	-0.112203
	0.222447	-0.0953067
	0.235013	-0.075208
	0.247232	-0.052241
	0.259537	-0.0225537
	0.272585	0.0191565
	0.286847	0.0764872
	0.302312	0.150798
	0.318329	0.240367
	0.333815	0.338025
	0.34795	0.432874
	0.360634	0.517238
	0.372156	0.589641
	0.38271	0.651122
	0.392397	0.702174
	0.401406	0.742949
	0.409999	0.773773
	0.418398	0.794466
	0.426732	0.803006
	0.435066	0.794533
	0.443461	0.762781
	0.451992	0.705717
	0.460678	0.630352
	0.469451	0.548625
	0.478274	0.469662
	0.487187	0.398566
	0.496243	0.338226
	0.505436	0.289001
	0.514712	0.249009
	0.524018	0.216331
	0.533328	0.190289
	0.542638	0.170802
	0.551952	0.157396
	0.561273	0.148761
	0.570605	0.142504
	0.579995	0.135375
	0.589557	0.124264
	0.599448	0.107435
	0.609734	0.0858121
	0.620243	0.0636936
	0.630692	0.0464529
	0.640967	0.0356932
	0.651178	0.0278362
	0.661437	0.0189211
	0.671692	0.00934456
	0.681809	0.00263531
	0.691729	0.001031
	0.701491	0.00380689
	0.711172	0.00924062
	0.720848	0.0165047
	0.730593	0.024984
	0.740477	0.0323683
	0.750577	0.0350235
	0.760919	0.0315572
	0.771403	0.0249559
	0.781849	0.0194182
	0.792183	0.0156408
	0.802506	0.010619
	0.812934	0.00187381
	0.823423	-0.00922348
	0.833813	-0.0185293
	0.844023	-0.0227862
	0.85411	-0.0214936
	0.864151	-0.0148993
	0.874178	-0.000839827
	0.884199	0.0250024
	0.894224	0.0643441
	0.904245	0.111479
8	0.143692	0.0541796
	0.154937	0.0650712
	0.166321	0.0772131
	0.178109	0.092783
	0.190072	0.109828
	0.201826	0.123518
	0.21316	0.129357
	0.224049	0.126501
	0.23459	0.118565
	0.24497	0.110874
	0.25536	0.106863
	0.265755	0.10692
	0.276021	0.110137
	0.286091	0.116118
	0.295998	0.123746
	0.305743	0.129175
	0.315344	0.128473
	0.324997	0.123693
	0.334971	0.12248
	0.345243	0.128932
	0.355401	0.138371
	0.365086	0.143696
	0.37436	0.144258
	0.383486	0.145045
	0.392517	0.147724
	0.401248	0.146265
	0.409573	0.134145
	0.417717	0.114366
	0.426067	0.0983406
	0.434891	0.0940909
	0.444103	0.0995736
	0.453377	0.108277
	0.462459	0.11691
	0.471273	0.126264
	0.479827	0.137628
	0.48814	0.151758
	0.496267	0.171079
	0.504305	0.200497
	0.512391	0.244545
	0.520654	0.302868
	0.529111	0.36844
	0.537601	0.43093
	0.545908	0.483326
	0.553966	0.52751
	0.561849	0.573953
	0.56961	0.634118
	0.577181	0.711561
	0.584482	0.800208
	0.59157	0.889989
	0.59857	0.971852
	0.605551	1.03804
	0.612531	1.08175
	0.619511	1.10031
	0.626491	1.09831
	0.633471	1.08406
	0.640454	1.06132
	0.64747	1.02674
	0.654678	0.975854
	0.662479	0.908454
	0.671365	0.827962
	0.681551	0.738616
	0.692879	0.64382
	0.705006	0.547021
	0.71755	0.454069
	0.730141	0.372207
	0.742629	0.304157
	0.7553	0.245906
	0.768686	0.19281
	0.783027	0.14526
	0.798065	0.106419
	0.813383	0.0769311
	0.828612	0.0546297
	0.843285	0.0378953
	0.85698	0.0266169
	0.869897	0.0194627
	0.882983	0.0117549
9	0.116225	0.00797379
	0.126299	0.0402746
	0.136375	0.0772131
	0.14638	0.111343
	0.156234	0.133226
	0.165903	0.137456
	0.175417	0.128368
	0.184832	0.117977
	0.194196	0.116513
	0.203572	0.124901
	0.213056	0.136911
	0.222711	0.145296
	0.232416	0.143577
	0.241927	0.127666
	0.2512	0.101794
	0.260392	0.0807347
	0.269675	0.080404
	0.279158	0.102709
	0.28872	0.130206
	0.29812	0.138964
	0.307304	0.118955
	0.316399	0.0822353
	0.325533	0.0522823
	0.334848	0.0466731
	0.344388	0.0671506
	0.353941	0.0992657
	0.363267	0.119715
	0.372377	0.109154
	0.381404	0.0642225
	0.390423	0.00221342
	0.399479	-0.046175
	0.40868	-0.0548474
	0.418119	-0.0199324
	0.42768	0.0367279
	0.437101	0.0827952
	0.446285	0.0975437
	0.455336	0.0827801
	0.464358	0.058575
	0.473406	0.0510349
	0.482597	0.0785682
	0.492064	0.140699
	0.501693	0.215636
	0.51116	0.273132
	0.520349	0.294547
	0.52939	0.281781
	0.538399	0.25102
	0.547404	0.220618
	0.556409	0.202452
	0.565415	0.200725
	0.57442	0.214422
	0.583425	0.237751
	0.59243	0.261001
	0.601435	0.277445
	0.61044	0.291126
	0.619446	0.314206
	0.628451	0.355992
	0.637456	0.417381
	0.646461	0.493847
	0.655467	0.577625
	0.664475	0.65651
	0.673511	0.716598
	0.682666	0.749836
	0.692091	0.758008
	0.70184	0.749489
	0.711822	0.732195
	0.721962	0.708956
	0.73231	0.679217
	0.743013	0.642489
	0.754306	0.598717
	0.766532	0.547633
	0.779992	0.490272
	0.794617	0.431908
	0.809859	0.382032
	0.825141	0.347773
	0.840402	0.324738
	0.856092	0.301194
10	0.115853	-0.108069
	0.126146	-0.0786716
	0.136651	-0.0471341
	0.14724	-0.0191473
	0.157847	0.00199249
	0.168448	0.0163568
	0.179011	0.0247873
	0.189476	0.0265526
	0.199796	0.0218546
	0.210017	0.0154637
	0.220277	0.0141039
	0.230683	0.0200354
	0.241171	0.0287829
	0.251524	0.0325126
	0.261558	0.0257975
	0.271284	0.00962565
	0.28084	-0.00972882
	0.290388	-0.0248681
	0.300112	-0.0293723
	0.310268	-0.0186654
	0.321015	0.00635345
	0.332141	0.0368486
	0.343147	0.0623014
	0.353691	0.0805426
	0.363839	0.100019
	0.373896	0.133359
	0.384122	0.188535
	0.394529	0.263181
	0.404848	0.345644
	0.414727	0.421632
	0.424036	0.482099
	0.432991	0.528679
	0.441976	0.572789
	0.45127	0.626656
	0.460772	0.692165
	0.470013	0.759148
	0.478619	0.815521
	0.486652	0.856279
	0.494416	0.883203
	0.502111	0.901145
	0.509796	0.916088
	0.517481	0.932962
	0.525165	0.951765
	0.53285	0.966202
	0.540534	0.968282
	0.548219	0.954944
	0.555906	0.930092
	0.563614	0.900074
	0.571432	0.867478
	0.579556	0.830029
	0.588176	0.784319
	0.597336	0.728468
	0.606965	0.662057
	0.616922	0.587197
	0.626963	0.51106
	0.636833	0.443951
	0.646478	0.391221
	0.656108	0.348352
	0.666009	0.307164
	0.676321	0.265087
	0.686979	0.225705
	0.697861	0.192475
	0.708937	0.165051
	0.7202	0.14178
	0.731504	0.123935
	0.7426	0.115201
	0.753432	0.115447
	0.764324	0.116422
	0.775769	0.107335
	0.787997	0.0849878
	0.800759	0.0564857
	0.813561	0.0333627
	0.826029	0.0233595
	0.838008	0.0263434
	0.849512	0.0375483
	0.86069	0.0525441
11	0.167004	0.0181702
	0.180916	0.033291
	0.195017	0.0510432
	0.208473	0.0651246
	0.221278	0.073396
	0.234291	0.0813465
	0.247919	0.0946997
	0.261645	0.11231
	0.274994	0.131671
	0.288141	0.156899
	0.301406	0.19656
	0.314704	0.255133
	0.327556	0.327928
	0.339365	0.403987
	0.349863	0.474414
	0.359427	0.540152
	0.368782	0.610655
	0.378413	0.693706
	0.388292	0.790432
	0.398061	0.89899
	0.40732	1.01576
	0.415741	1.13072
	0.423243	1.22801
	0.430118	1.29511
	0.436755	1.32984
	0.443346	1.33937
	0.449933	1.33396
	0.45652	1.31988
	0.463107	1.29769
	0.469694	1.26526
	0.476285	1.21872
	0.482918	1.1511
	0.489737	1.05661
	0.496951	0.942011
	0.504551	0.829113
	0.5123	0.738002
	0.520015	0.671596
	0.527635	0.622276
	0.535121	0.58468
	0.542501	0.554226
	0.549957	0.520678
	0.557768	0.473015
	0.566135	0.410139
	0.57501	0.342771
	0.584181	0.284283
	0.593464	0.240544
	0.602775	0.208092
	0.612091	0.18013
	0.621406	0.15249
	0.630722	0.123481
	0.640037	0.0911799
	0.649352	0.0547767
	0.658668	0.0182411
	0.667983	-0.0101011
	0.677299	-0.0235758
	0.686614	-0.0240031
	0.69593	-0.0217665
	0.705245	-0.028014
	0.714561	-0.0470029
	0.723875	-0.0740694
	0.733178	-0.099314
	0.742421	-0.114427
	0.751483	-0.116618
	0.760238	-0.107954
	0.768745	-0.095415
	0.777349	-0.0910941
	0.786486	-0.105544
	0.7962	-0.136151
	0.805853	-0.163221
	0.814675	-0.159092
	0.822563	-0.102037
	0.830035	0.00986239
	0.837663	0.149613
	0.845838	0.274834
	0.85456	0.358814
	0.863469	0.401961
12	0.114859	-0.0112333
	0.125184	0.00378411
	0.135458	0.0206324
	0.145346	0.0268051
	0.154691	0.0140454
	0.163625	-0.0123093
	0.172399	-0.0379941
	0.181261	-0.0516166
	0.190458	-0.0507486
	0.200183	-0.0403061
	0.210418	-0.027337
	0.220878	-0.0166576
	0.231165	-0.0105526
	0.241048	-0.00966112
	0.250637	-0.0109158
	0.260274	-0.00696264
	0.270206	0.00730821
	0.2803	0.0283238
	0.29016	0.0471863
	0.299607	0.0578784
	0.308859	0.0615426
	0.318305	0.0648413
	0.328164	0.0732647
	0.33824	0.0849673
	0.348084	0.0932804
	0.357467	0.0955089
	0.366537	0.0955978
	0.375602	0.0983879
	0.384863	0.105661
	0.394265	0.117931
	0.403586	0.13691
	0.412724	0.164669
	0.421748	0.200119
	0.430721	0.237586
	0.439644	0.271835
	0.448541	0.304608
	0.457455	0.342008
	0.466321	0.384478
	0.475012	0.425012
	0.483517	0.458179
	0.491915	0.484431
	0.500194	0.505406
	0.508257	0.521514
	0.516103	0.536193
	0.523844	0.558253
	0.531563	0.595461
	0.53928	0.644675
	0.546996	0.692209
	0.554713	0.727405
	0.562429	0.751698
	0.570145	0.771733
	0.577862	0.788373
	0.585579	0.796944
	0.593301	0.794889
	0.601077	0.783181
	0.609118	0.76116
	0.617931	0.724387
	0.628058	0.669387
	0.639457	0.600148
	0.65144	0.52796
	0.663382	0.462214
	0.675312	0.403331
	0.687689	0.347008
	0.700795	0.292063
	0.714436	0.241937
	0.728174	0.200967
	0.741731	0.17093
	0.75523	0.150166
	0.769136	0.135009
	0.783929	0.121835
	0.799775	0.1079
	0.816554	0.0912689
	0.834134	0.0712287
	0.852361	0.0489566
	0.870929	0.026662
	0.889584	0.0053793

## Sheet: Fig 4F
Figure 4F
Microneedle positions where positions along k-fiber are maximally overlapping
WT	Manipulation generated negative curvature near chromosome (yes/no)		PRC1 RNAi	Manipulation generated negative curvature near chromosome (yes/no)
0.650909	yes		0.555883	no
0.630305	yes		0.486613	no
0.571517	yes		0.468677	no
0.499377	yes		0.521351	no
0.586637	yes		0.490103	no
0.669162	yes		0.510654	no
0.430143	yes		0.426732	yes
0.688198	yes		0.619511	no
0.516041	yes		0.692091	no
0.484985	yes		0.540534	no
0.548442	yes		0.443346	no
0.539051	yes		0.585579	no
0.644241	no
0.609136	no
0.468121	no
0.606236	no
0.527053	yes

## Sheet: Fig 4H,I,J
Figure 4H				Figure 4I				Figure 4J
Interkinetochore distance (Deformed - undeformed)				Angle of sister k-fiber from pole-pole axis (Deformed - undeformed)				Angle between sister k-fiber plus-end regions
WT, unmanipulated	WT, manipulated	PRC1 RNAi, manipulated		WT, unmanipulated	WT, manipulated	PRC1 RNAi, manipulated		WT, manipulated	PRC1 RNAi, manipulated
-0.538545	0.576395	0.73389		1.282	-9.366	-4.385		177.58	179.741
-0.082215	0.253967	1.21526		-2.023	-8.248	-2.276		174.38	155.769
0.200025	-0.173855	0.966166		1.576	-14.611	-7.954		163.131	177.094
-0.02499	0.00513559	0.506878		2.297	-15.673	-4.423		178.423	148.907
0.073815	0.021762	0.421134		1.937	-11.946	-8.219		171.87	176.468
0.284025	0.366523	0.410253		-1.284	-16.649	0.043		178.868	171.01
-0.12537	0.181734	0.38856		2.105	-5.901	4.285		174	152.045
-0.488775	-0.0354149	0.743909		2.163	-14.101	-7.378		173.4	152.393
-0.40383				-0.453	-7.171	0.096		172.579	178.091
-0.177				-3.277	-5.489			175.601	152.7
-0.772				4.824	-7.499			175.236
0.089				2.792				178.172
-0.022								176.682
								175.684
								174.289
								177.274
								175.03
								177.51
								159.454
								158.526
