# Supplementary figures and images for: Microneedle manipulation of the mammalian spindle reveals specialized, short-lived reinforcement near chromosomes
Source: eLife journal article supplement (doi:10.7554/elife.53807), 2020-03-19

**Figure 2- figure supplement 1:**  
**Kinetochores-fiber length does not change over 12 s manipulations**

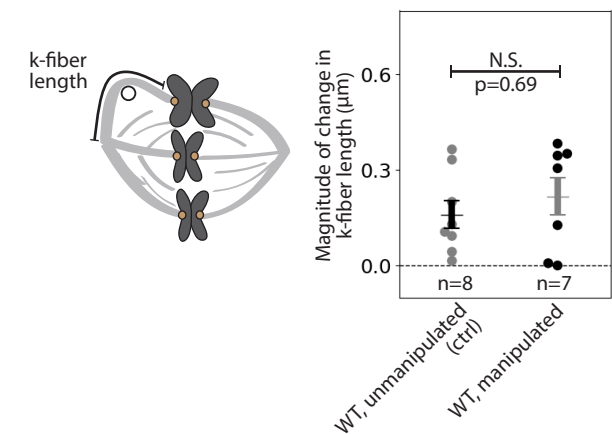

Supplement: supp [file elife-53807-supp-v1.zip]

**Figure 4- figure supplement 1:**  
**Validation of PRC1 depletion by RNAi**

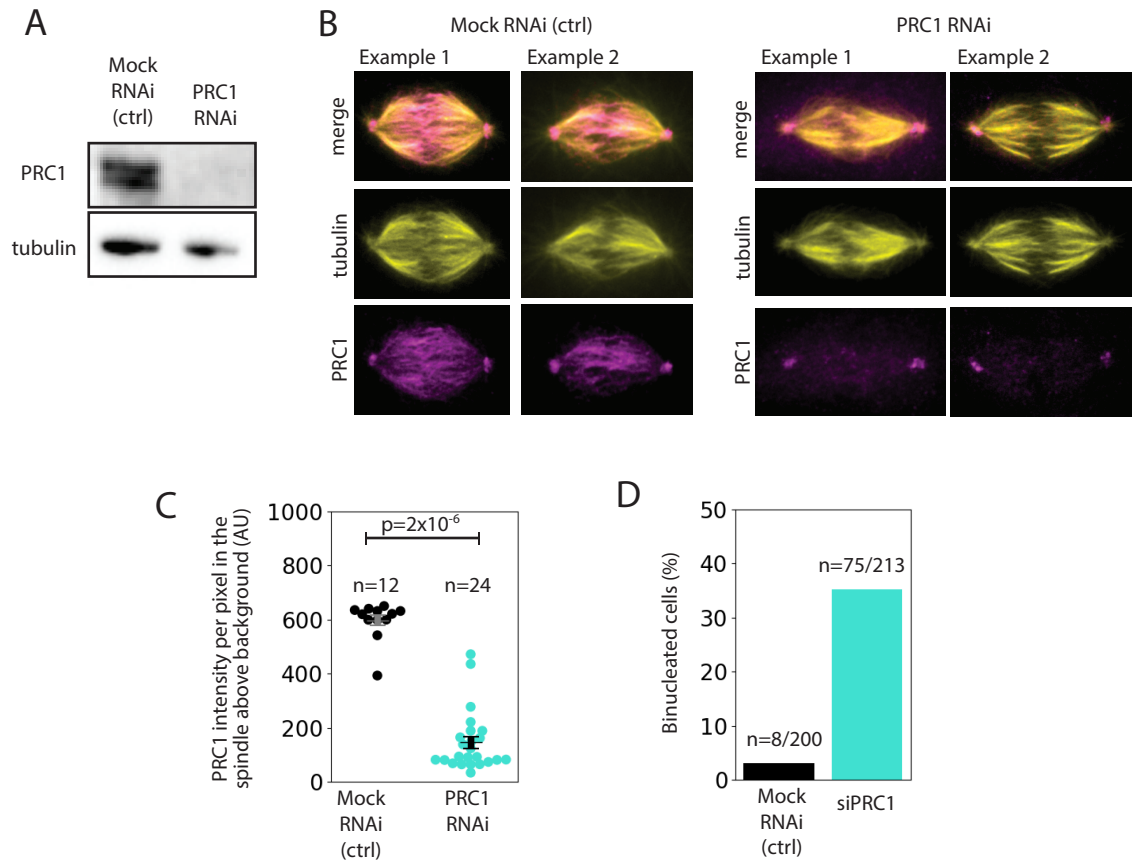

Supplement: supp [file elife-53807-supp-v1.zip]
